# Supplementary material for: Impact of the Histidine-Triazole and Tryptophan-Pyrene Exchange in the WHW Peptide: Cu(II) Binding, DNA/RNA Interactions and Bioactivity
Source: MDPI journal article supplement (doi:10.3390/ijms23137006), 2022-06-23
Supplement: s1 [file s1]

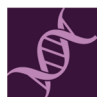

# Supporting information: Impact of the Histidine-Triazole and Tryptophan-Pyrene Exchange in the WHW Peptide: Cu(II) Binding, DNA/RNA Interactions and Bioactivity

Ivona Krošl <sup>1</sup>, Marta Koščak <sup>1</sup>, Karla Ribičić <sup>1</sup>, Biserka Žinić <sup>1</sup>, Dragomira Majhen <sup>2</sup>, Ksenija Božinović <sup>2</sup> and Ivo Piantanida <sup>1,\*</sup>

<sup>1</sup> Division of Organic Chemistry and Biochemistry, Ruđer Bošković Institute, Bijenička Cesta 54,

10000 Zagreb, Croatia; ivona.krosl@irb.hr (I.K.); marta.koscak@irb.hr (M.K.); karla.ribica@gmail.com (K.R.); biserka.zinic@irb.hr (B.Ž.)

<sup>2</sup> Division of Molecular Biology, Ruđer Bošković Institute, Bijenička Cesta 54, 10000 Zagreb, Croatia;

dragomira.majhen@irb.hr (D.M.); ksenija.bozinovic@irb.hr (K.B.)

\* Correspondence: pianta@irb.hr; Tel.: +385-1-4571-326

## Contents

|                                                                    |           |
|--------------------------------------------------------------------|-----------|
| <b>1. Synthesis</b> .....                                          | <b>2</b>  |
| <b>2. Physico-chemical properties of aqueous solutions</b> .....   | <b>20</b> |
| <b>3. Study of interactions with double-stranded DNA/RNA</b> ..... | <b>29</b> |
| <b>4. Biology:</b> .....                                           | <b>41</b> |

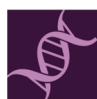

## 1. Synthesis

The Boc-protected PG **1** and tryptophan methyl ester hydrochloride **2** were prepared using known methods,[1,2] and subjected to standard coupling reaction using HBTU/HOBt coupling reagents and triethylamine in acetonitrile.[3] The Trp-A(alkyne) dipeptide **3** was isolated in 71% yield. The proton NMR spectrum of the diastereomeric mixture **3** (*D,L* + *L,L*) shows duplicated signals in a 1:1 diastereomeric ratio (see Supporting information Fig. S3b: e.g., two signals for OCH<sub>3</sub> at  $\delta$  3.58 and 3.55 ppm with total integration 3H for both signals).

The 1,2,3-triazole ring was synthesized by an *in situ* azidation/cycloaddition protocol[4,5] from Trp-A(alkyne) dipeptide **3** using sodium azide, chloromethyl pivalate, and the copper(II) sulfate/sodium ascorbate system. The protected dipeptide **4** was isolated with an excellent 87 % yield, and after deprotection of the Boc group with TFA/CH<sub>2</sub>Cl<sub>2</sub>, W-A(triazole) dipeptide **5** was obtained in quantitative yield.

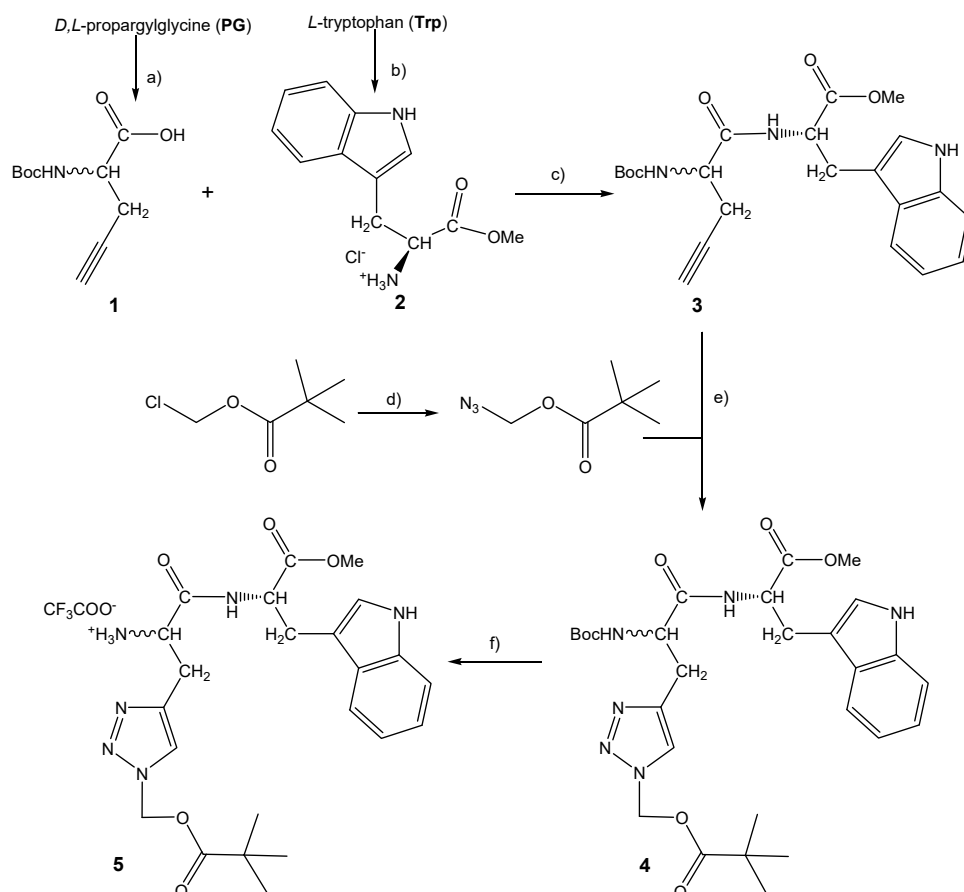

**Scheme S1.** Synthesis of W-A(triazole) dipeptide **5**: a) Boc<sub>2</sub>O, 2M NaOH, dioxane/H<sub>2</sub>O; rt 2 h, 97 %; b) Me<sub>3</sub>SiCl/MeOH, rt 48 h, 90 %; c) HOBt, HBTU, Et<sub>3</sub>N/CH<sub>3</sub>CN, rt 16 h, 71 %; d) NaN<sub>3</sub>, Na-askorbat, CuI, DMEDA/EtOH, H<sub>2</sub>O; 90 °C, 1 h; e) Na-askorbat, CuI, DMEDA, 90 °C, 30 min, 87 %; f) TFA/CH<sub>2</sub>Cl<sub>2</sub> (1:1), 20 h, 100 %.

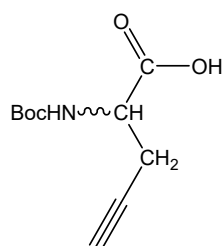

**2-((*tert*-Butoxycarbonyl)amino)pent-4-ynoic acid (1)** [Error! Bookmark not defined.]

*D,L*-Propargylglycine (PG) (1 g, 8.84 mmol) was dissolved in a solvent mixture of 1,4-dioxane/H<sub>2</sub>O (*v:v* = 2:1; 18 mL), cooled to 0 °C, and 2 M NaOH solution (4.42 mL, 8.84 mmol) was added dropwise followed by di-*tert*-butyl dicarbonate (2.14 g, 9.81 mmol). The reaction was stirred for 15 min at 0 °C, then allowed to warm to room temperature and stirred for an additional 2 h. The 1,4-dioxane was removed *in vacuo*, and the resulting aqueous residue washed with ethyl acetate (20 mL). The aqueous solution was acidified to pH 2–3 with saturated aqueous KHSO<sub>4</sub> solution (7 mL) and extracted with ethyl acetate (3 × 40 mL). The combined organics extracts were washed with water (25 mL) and dried over Na<sub>2</sub>SO<sub>4</sub>. The solvent was removed *in vacuo* to afford Boc-protected PG **1**, as a light yellow oil which with drying turns to solid (1.838 g, 97 %): *R*<sub>f</sub> = 0.22 (CH<sub>2</sub>Cl<sub>2</sub>/MeOH = 9:1); <sup>1</sup>H NMR (DMSO-*d*<sub>6</sub>)  $\delta$ /ppm: 12.76 (brs, 1H, COOH), 7.05 (d, *J* = 8.3 Hz, 1H, NH), 4.05 (td, *J* = 8.4, 5.3 Hz, 1H, CH), 2.85 (s, 1H, HC≡C-), 2.70–2.33 (m, 2H, CH<sub>2</sub> covered with DMSO), 1.39 (s, 9H, Me<sub>3</sub>C-O-); <sup>13</sup>C NMR (DMSO-*d*<sub>6</sub>)  $\delta$ /ppm: 172.2 (HO-C=O), 155.2 (Me<sub>3</sub>C-O-C=O), 80.7 (Cq, Me<sub>3</sub>C-O-), 78.3 (HC≡C-), 72.8 (HC≡C-), 52.4 (CH), 28.1 (Me<sub>3</sub>C-O-), 21.1(CH<sub>2</sub>); (see Supporting Information Fig. S1).

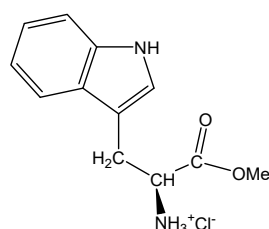

**(*S*)-3-(1*H*-Indol-3-yl)-1-methoxy-1-oxopropan-2-aminium chloride (2)** [Error! Bookmark not defined.]



Freshly distilled chlorotrimethylsilane (2.588 mL, 20.4 mmol) was added slowly to *L*-tryptophan (2.081 g, 10.2 mmol) in a round bottom flask. Then methanol (10 mL) was added and the resulting suspension was stirred at room temperature for 48 h. The solvent was removed *in vacuo* to give the product **2** (2.34 g, 90 %) as a white solid:  $R_f$  = 0.65 ( $\text{CH}_2\text{Cl}_2/\text{MeOH}$  = 9:1);  $^1\text{H}$  NMR ( $\text{DMSO}-d_6$ )  $\delta$ /ppm: 11.15 (s, 1H, NH-Trp), 8.70 (s, 3H,  $\text{NH}_3^+$ ), 7.52 (d,  $J$  = 7.7 Hz, 1H, Trp), 7.37 (d,  $J$  = 7.9 Hz, 1H, Trp), 7.26 (d,  $J$  = 1.9 Hz, 1H, Trp), 7.08 (t,  $J$  = 7.3 Hz, 1H, Trp), 7.00 (t,  $J$  = 7.3 Hz, 1H, Trp), 4.19 (t,  $J$  = 6.0 Hz, 1H, CH), 3.63 (s, 3H,  $\text{OCH}_3$ ), 3.42–3.27 (m, 2H,  $\text{CH}_2$ );  $^{13}\text{C}$  NMR ( $\text{DMSO}-d_6$ )  $\delta$ /ppm: 169.7 ( $\text{MeO}-\text{C}=\text{O}$ ), 136.2 (Cq, Trp), 126.9 (Cq, Trp), 125.0 (CH, Trp), 121.1 (CH, Trp), 118.6 (CH, Trp), 118.0 (CH, Trp), 111.5 (CH, Trp), 106.3 (Cq, Trp), 52.6 (CH or  $\text{OCH}_3$ ), 52.57 (CH or  $\text{OCH}_3$ ), 26.1 ( $\text{CH}_2$ ); (see Supporting Information Fig. S2).

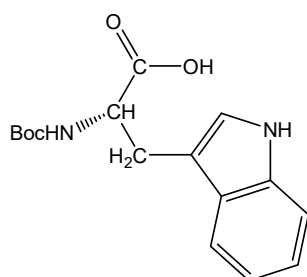

### (*tert*-Butoxycarbonyl)-*L*-tryptophan (**8**) [6]

*L*-Tryptophan (1 g, 4.8 mmol, 98%) was suspended in 1 M NaOH (4.8 mL), diluted with 3.6 mL of *tert*-butyl alcohol and di-*tert*-butyl dicarbonate (1.237 g 5.28 mmol) was then added in portions over 20 min. The reaction mixture was stirred at room temperature for 15 hours. The solvent was removed *in vacuo* and the resulting thick oil was dissolved in water. The aqueous solution was acidified to pH 1–2 with saturated aqueous  $\text{KHSO}_4$  solution and extracted with ethyl acetate ( $3 \times 15$  mL). The combined organic extracts were washed with water and dried over  $\text{Na}_2\text{SO}_4$ . The solvent was removed *in vacuo* to afford the target material Boc-protected tryptophan **8**, as a white solid (1.184 g, 81 %).  $^1\text{H}$  NMR ( $\text{DMSO}-d_6$ )  $\delta$ /ppm: 12.52 (s, 1H, COOH), 10.82 (s, 1H, NH-Trp), 7.53 (d,  $J$  = 7.9 Hz, 1H, Trp), 7.34 (d,  $J$  = 8.1 Hz, 1H, Trp), 7.15 (d,  $J$  = 1.3 Hz, 1H, Trp), 7.07 (t,  $J$  = 7.5 Hz, 1H, Trp), 6.99 (t,  $J$  = 7.4 Hz, 1H, Trp), 6.94 (d,  $J$  = 8.0 Hz, 1H, NH), 4.16 (td,  $J$  = 8.8, 4.8 Hz, 1H, CH), 3.14 (dd,  $J$  = 14.6, 4.6 Hz, 1H, Ha- $\text{CH}_2$ ), 2.99 (dd,  $J$  = 14.6, 9.4 Hz, 1H, Hb- $\text{CH}_2$ ), 1.33 (s, 9H,  $\text{Me}_3\text{C}-\text{O}-$ );  $^{13}\text{C}$  NMR ( $\text{DMSO}-d_6$ )  $\delta$ /ppm: 173.9 ( $\text{HO}-\text{C}=\text{O}$ ), 155.4 ( $\text{Me}_3\text{C}-\text{O}-\text{C}=\text{O}$ ), 136.1 (Cq, Trp), 127.2 (Cq, Trp),



123.6 (CH, Trp), 120.9 (CH, Trp), 118.3 (CH, Trp), 118.1 (CH, Trp), 111.4 (CH, Trp), 110.2 (Cq, Trp), 78.0 (Me<sub>3</sub>C-O-), 54.5 (CH), 28.2 (Me<sub>3</sub>C-O-) 26.8 (CH<sub>2</sub>); (see Supporting Information Fig. S8).

### NMR characterisation:

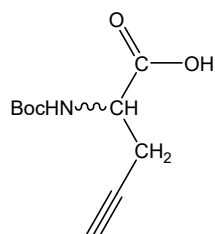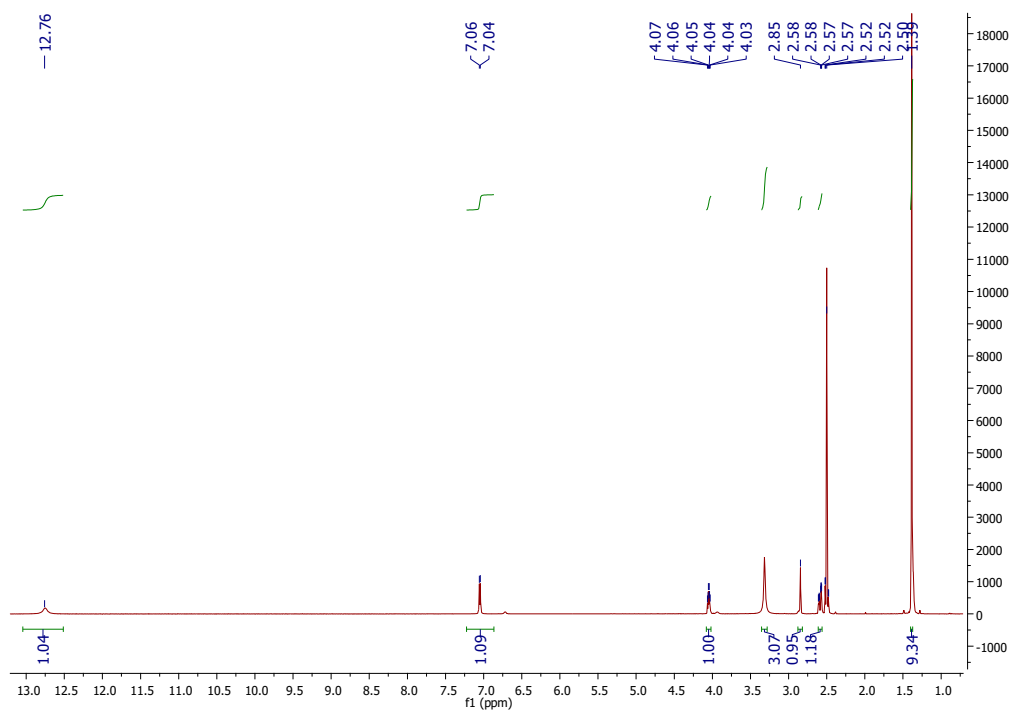

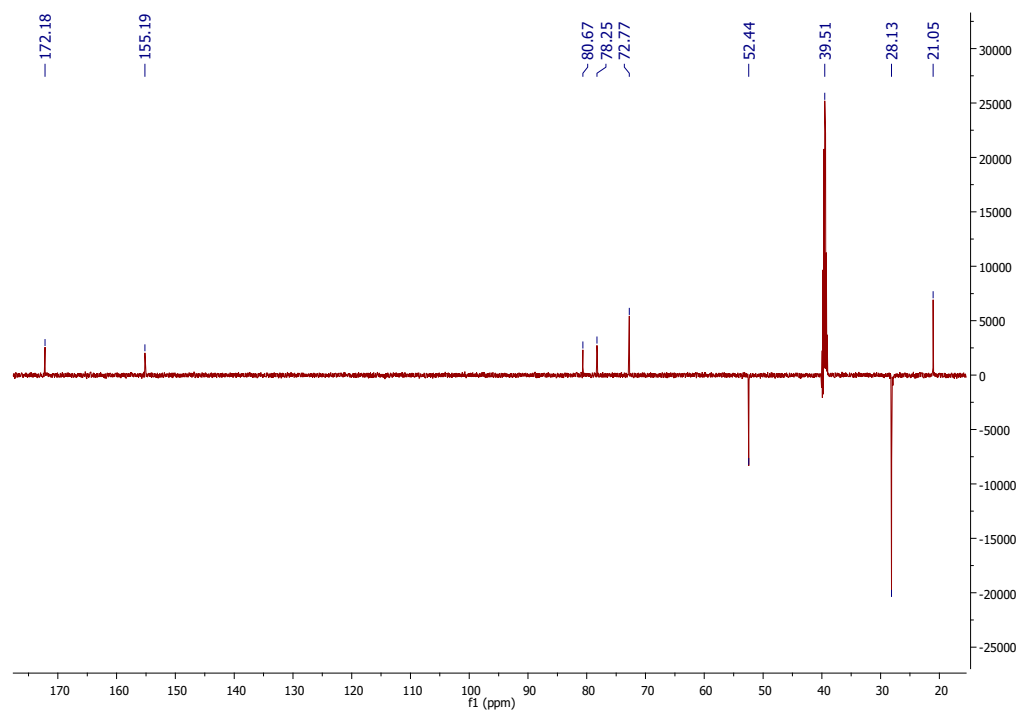

**Figure S1.** <sup>1</sup>H NMR (600 MHz, DMSO-*d*<sub>6</sub>) and <sup>13</sup>C NMR (151 MHz, APT, DMSO-*d*<sub>6</sub>) spectra of compound **1**.

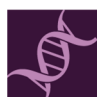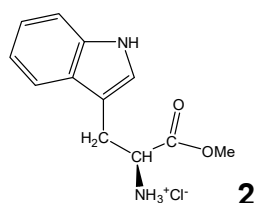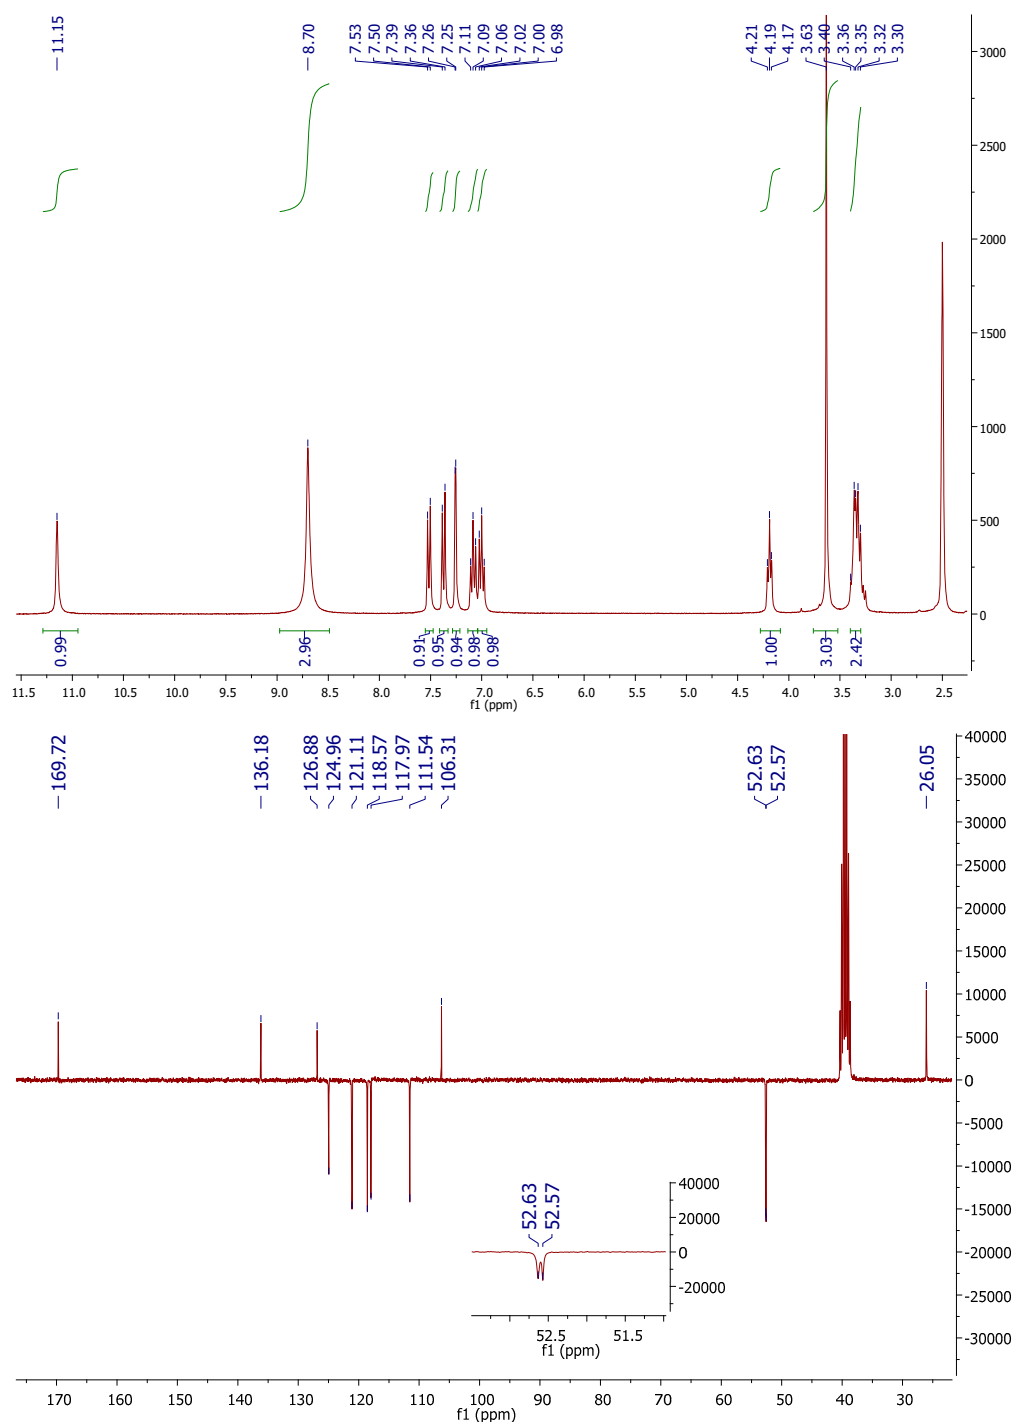

**Figure S2.** <sup>1</sup>H NMR (300 MHz, DMSO-*d*<sub>6</sub>) and <sup>13</sup>C NMR (75 MHz, APT, DMSO-*d*<sub>6</sub>) spectra of compound **2**.

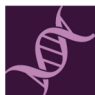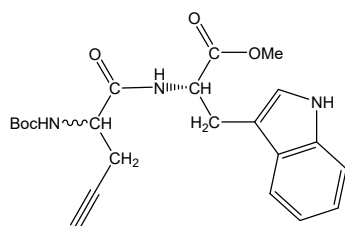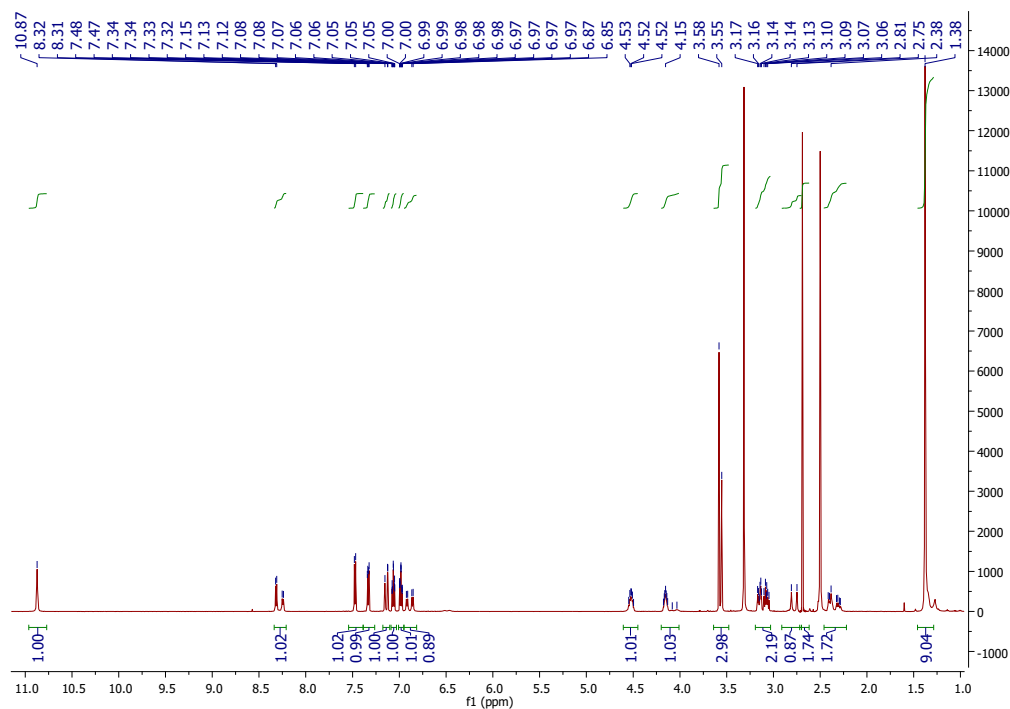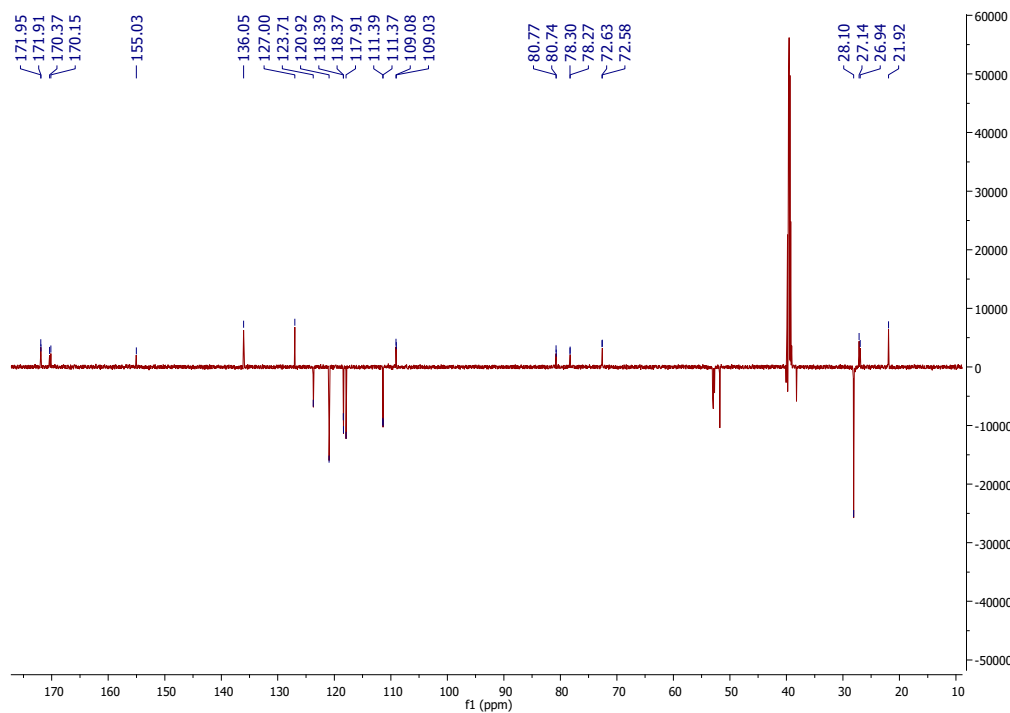



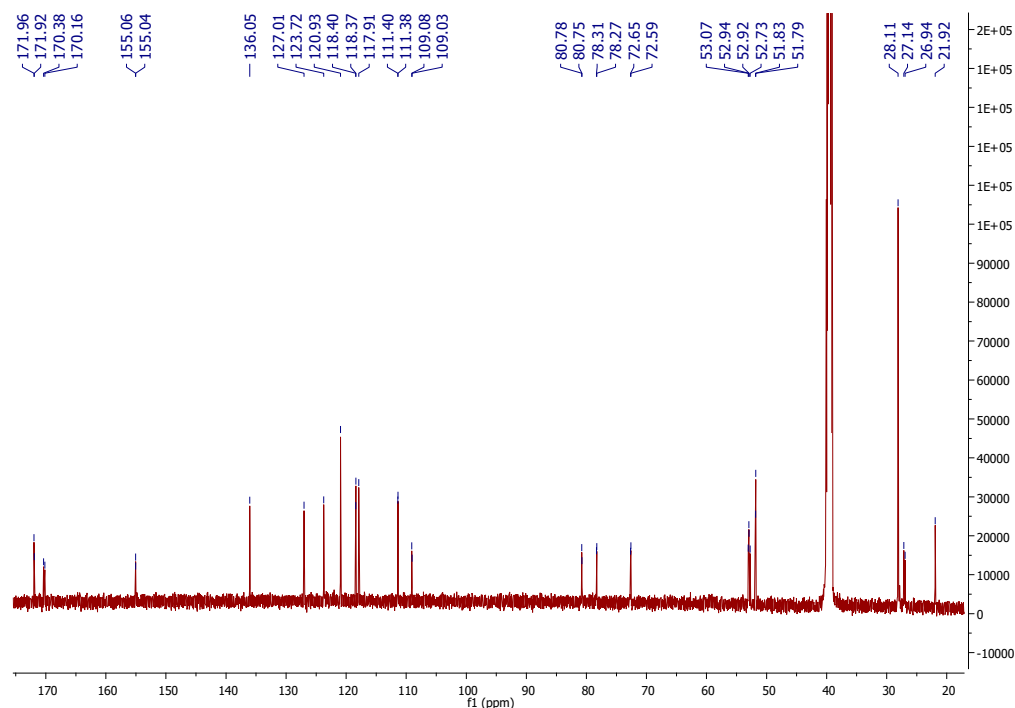

(a)

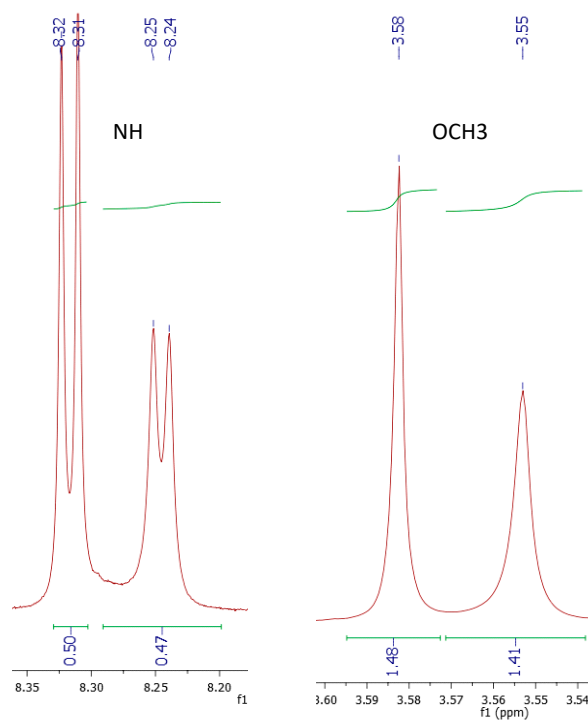

(b)

**Figure S3:** (a). <sup>1</sup>H NMR (600 MHz, DMSO-*d*<sub>6</sub>) and <sup>13</sup>C NMR (151 MHz, DMSO-*d*<sub>6</sub>) spectra of compound **3**. (b). Part of the <sup>1</sup>H NMR (600 MHz, DMSO-*d*<sub>6</sub>) spectrum of compound **3** for NH and OCH<sub>3</sub> protons.

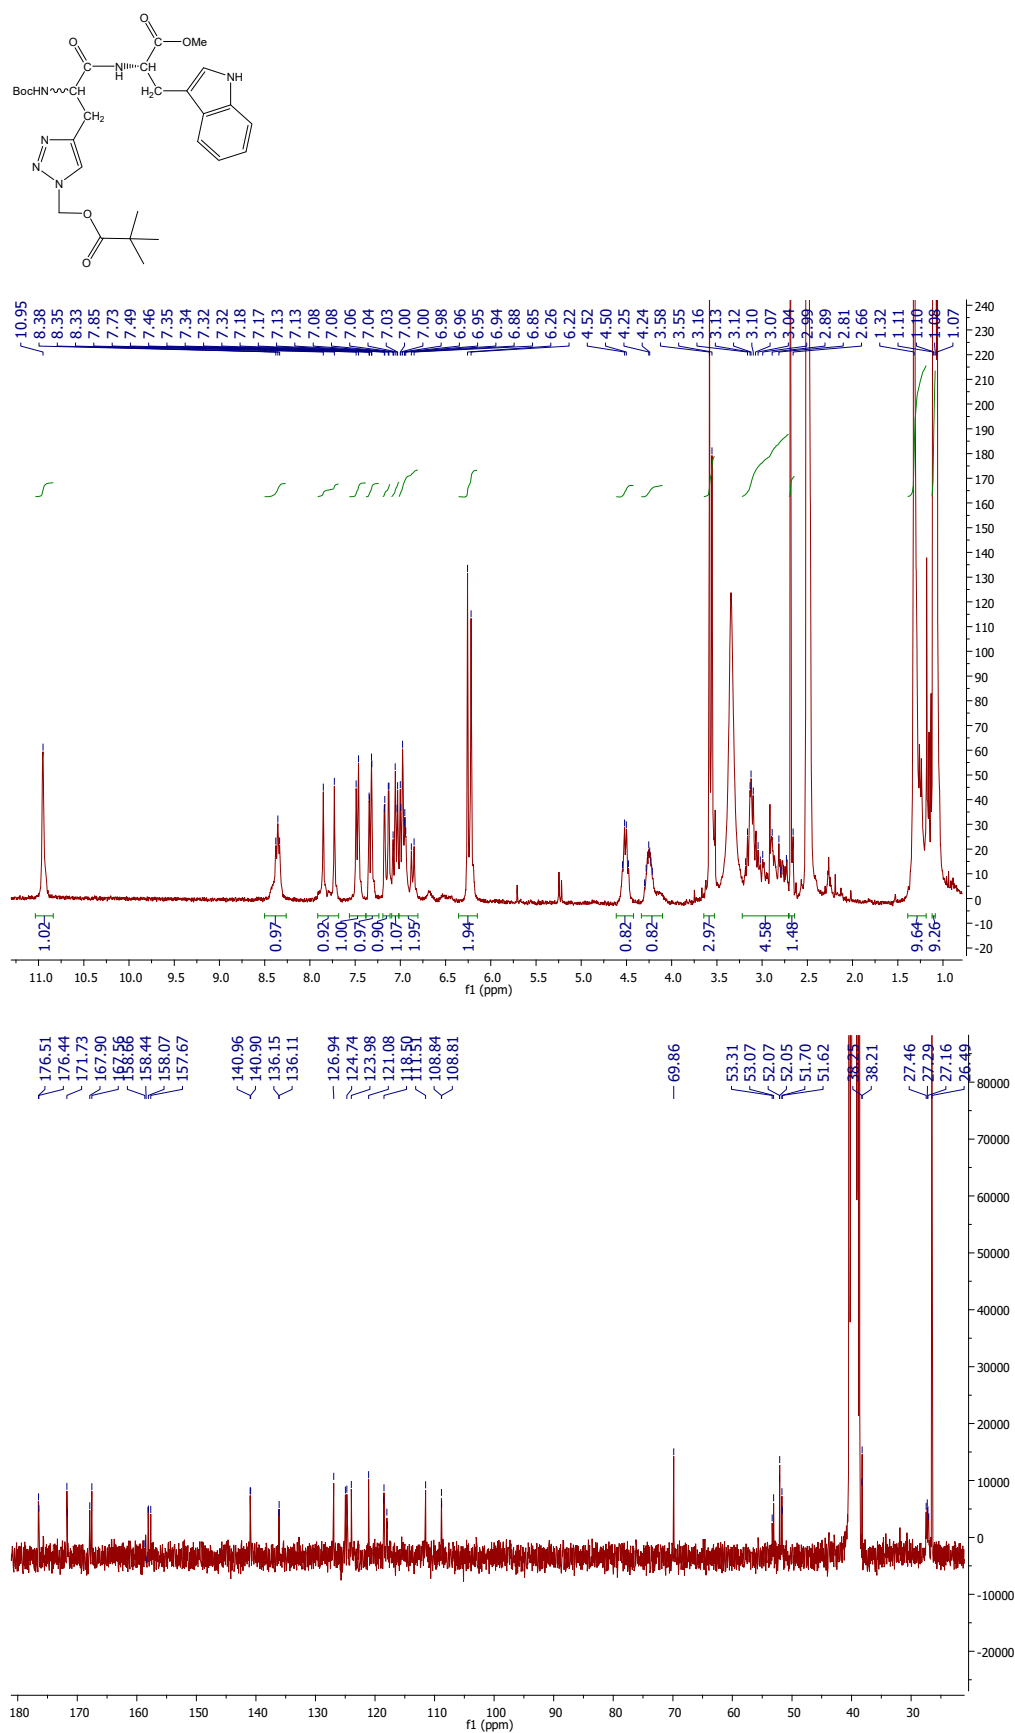

**Figure S4.** <sup>1</sup>H NMR (300 MHz, DMSO-*d*<sub>6</sub>) and <sup>13</sup>C NMR (151 MHz, DMSO-*d*<sub>6</sub>) spectra of compound 4.

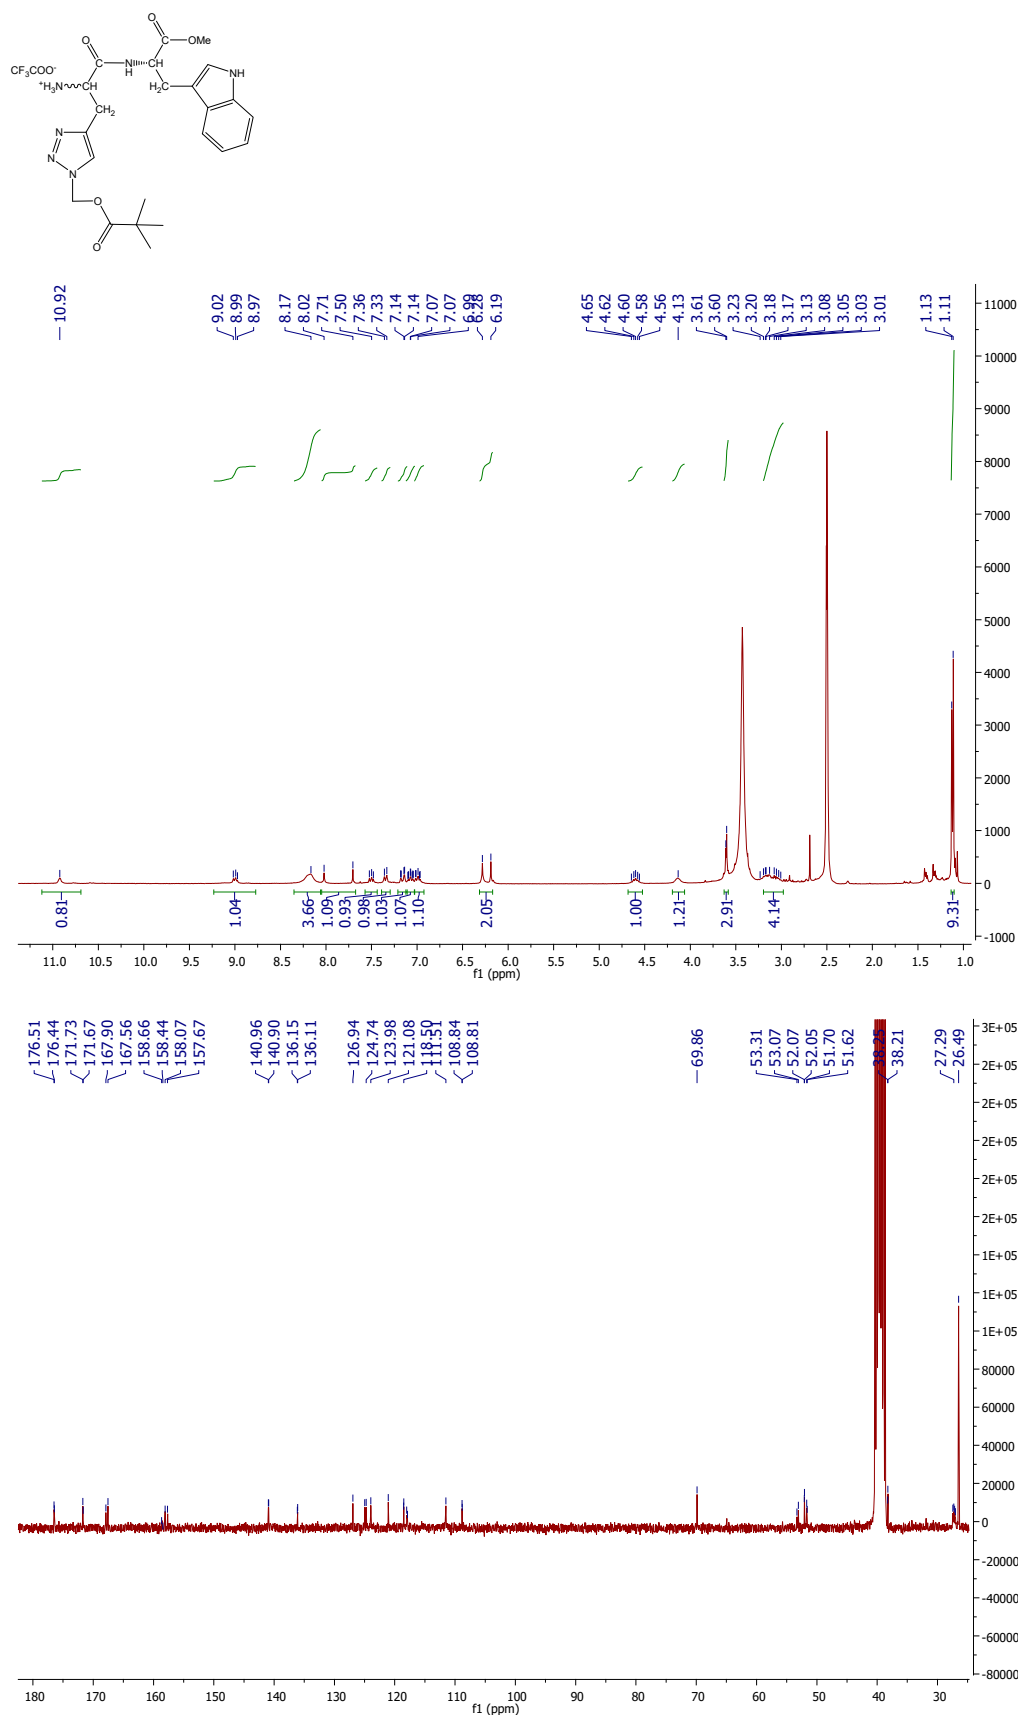

**Figure S5.** <sup>1</sup>H NMR (300 MHz, DMSO-*d*<sub>6</sub>) and <sup>13</sup>C NMR (75 MHz, DMSO-*d*<sub>6</sub>) spectra of compound **5**.

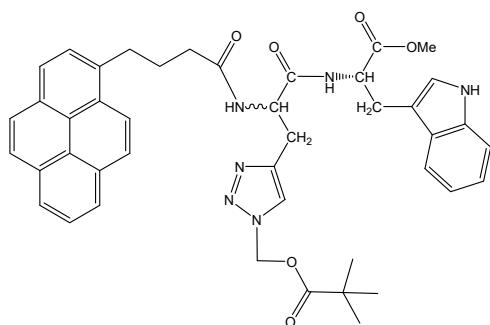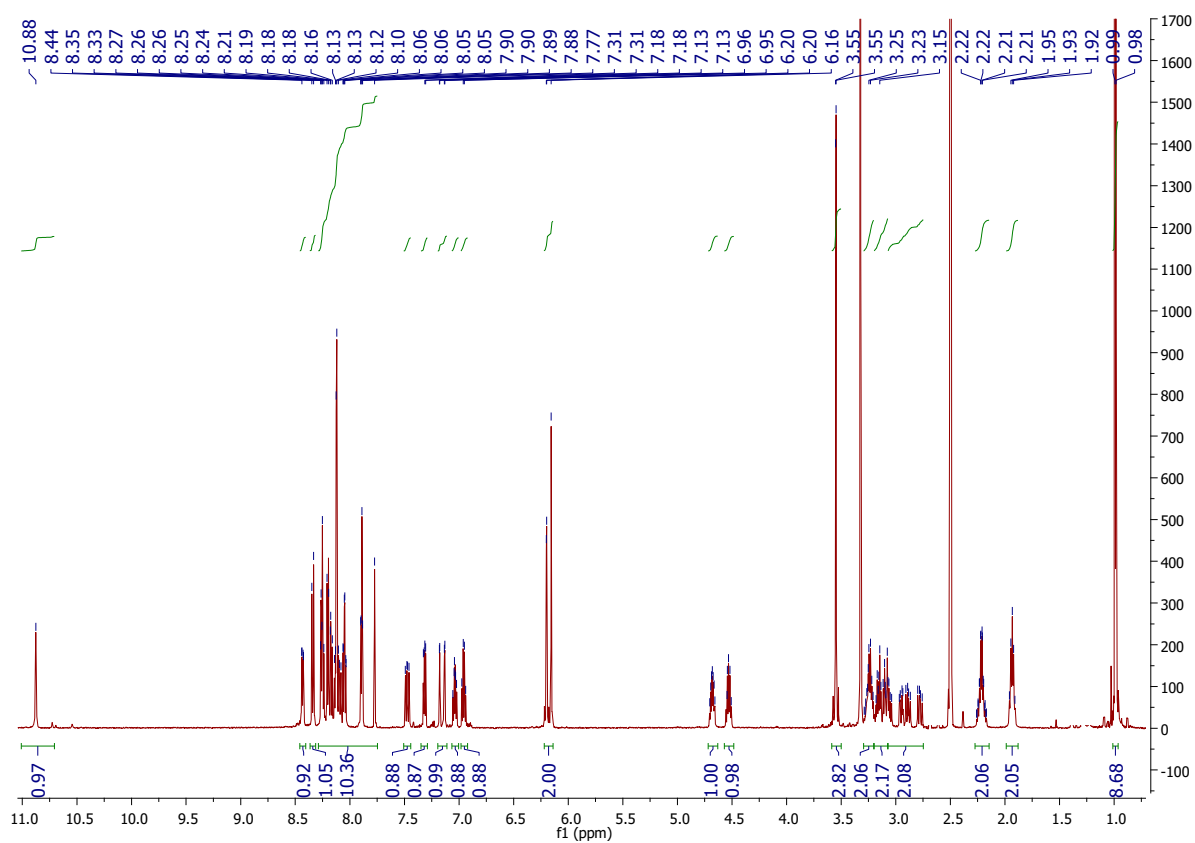

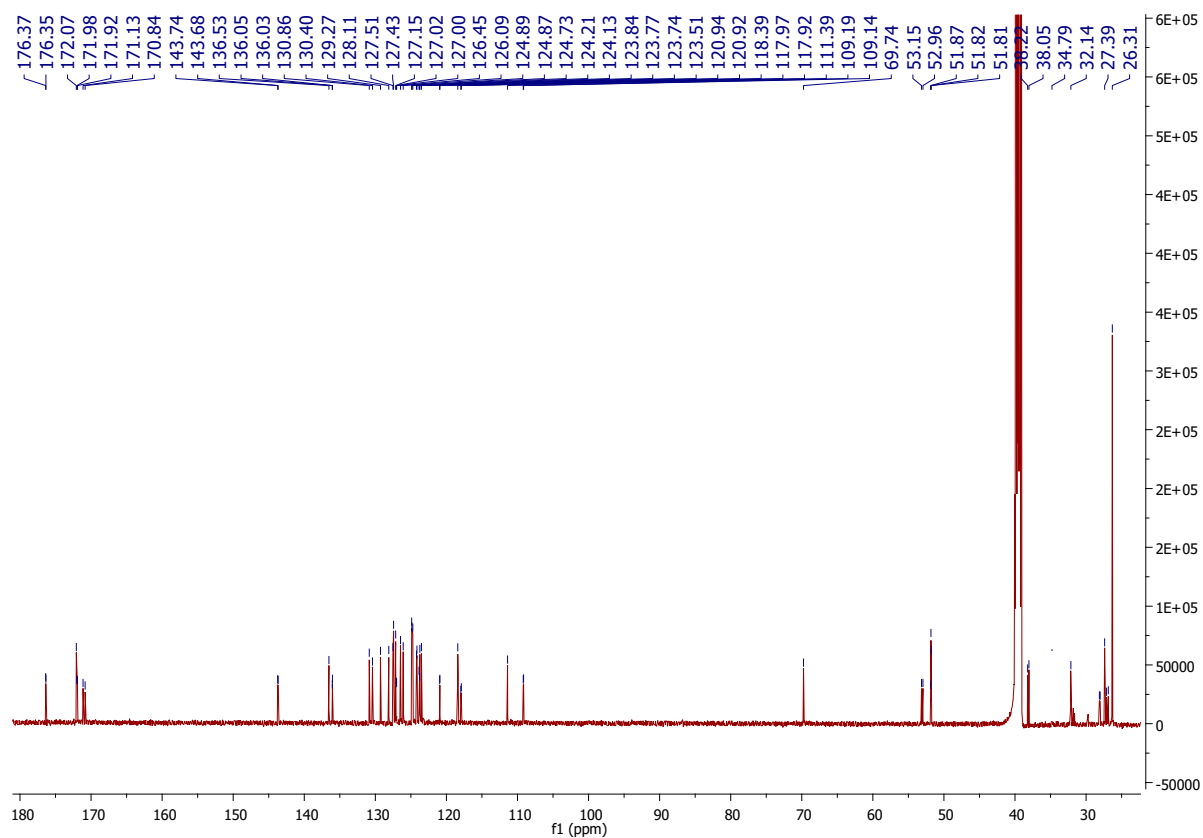

**Figure S6.**  $^1\text{H}$  NMR (600 MHz,  $\text{DMSO}-d_6$ ) and  $^{13}\text{C}$  NMR (151 MHz,  $\text{DMSO}-d_6$ ) spectra of compound **6**.

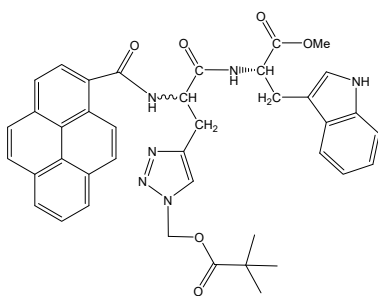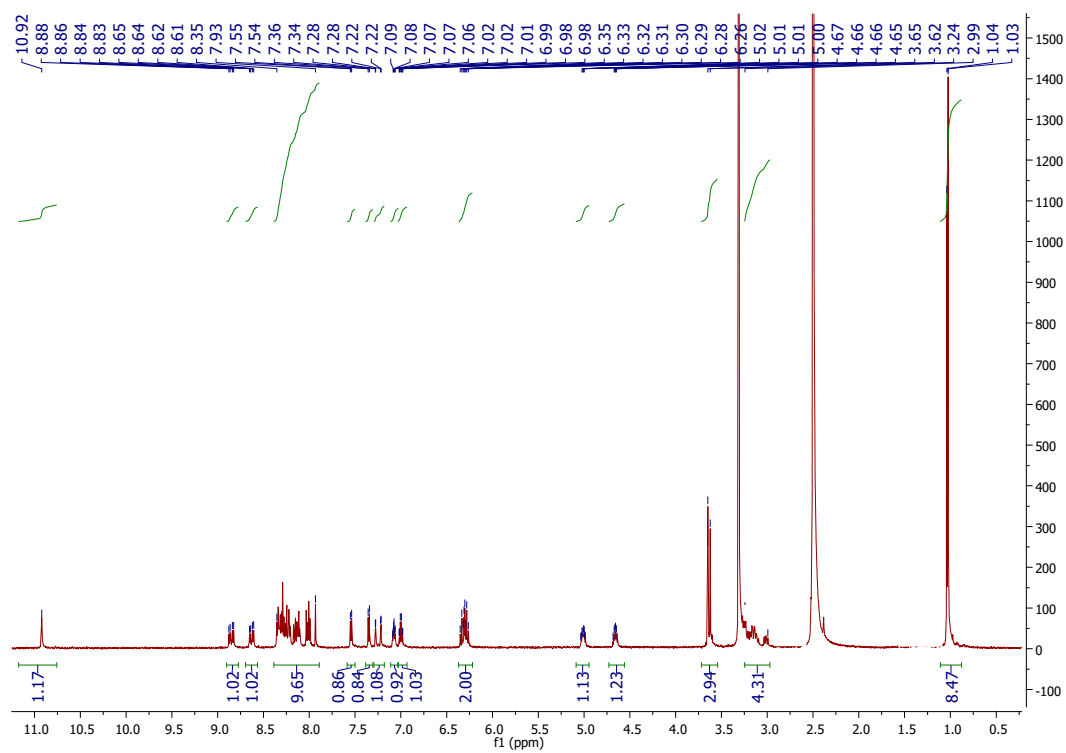

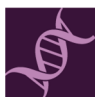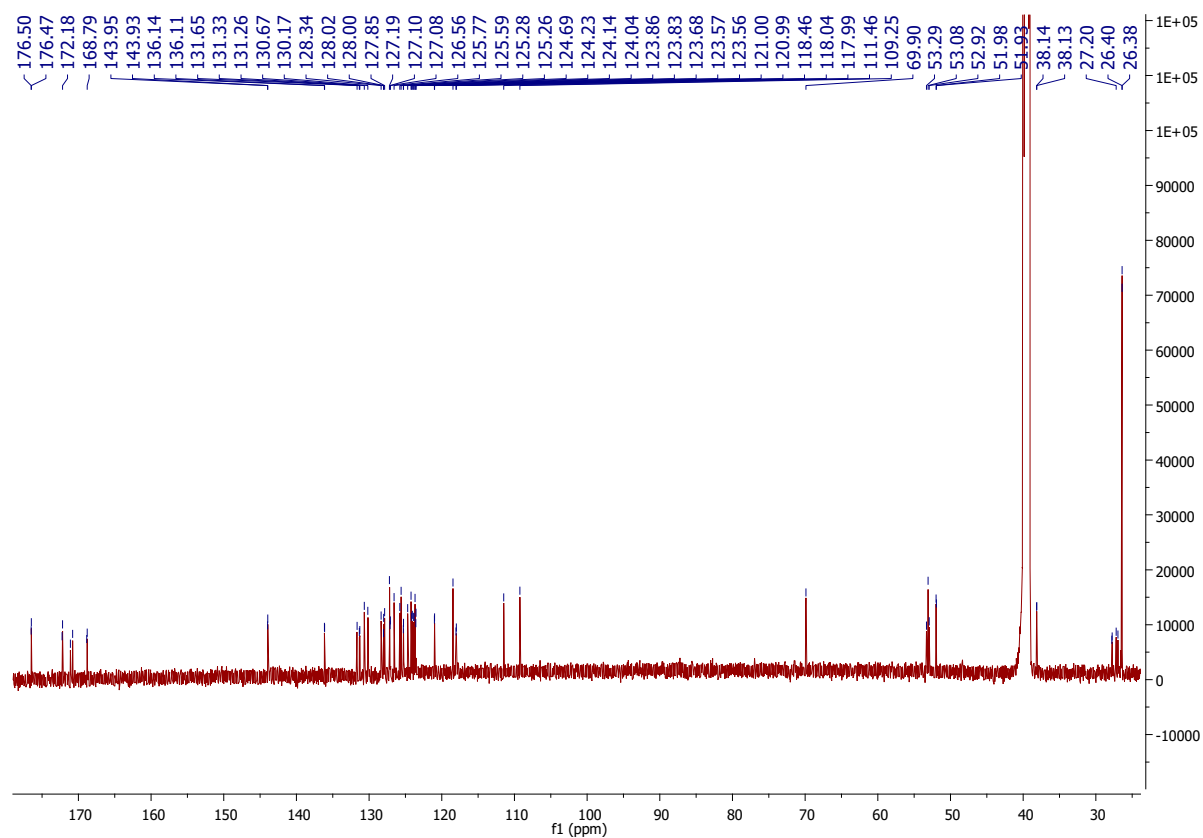

**Figure S7.**  $^1\text{H}$  NMR (600 MHz,  $\text{DMSO}-d_6$ ) and  $^{13}\text{C}$  NMR (151 MHz,  $\text{DMSO}-d_6$ ) spectra of compound **7**.

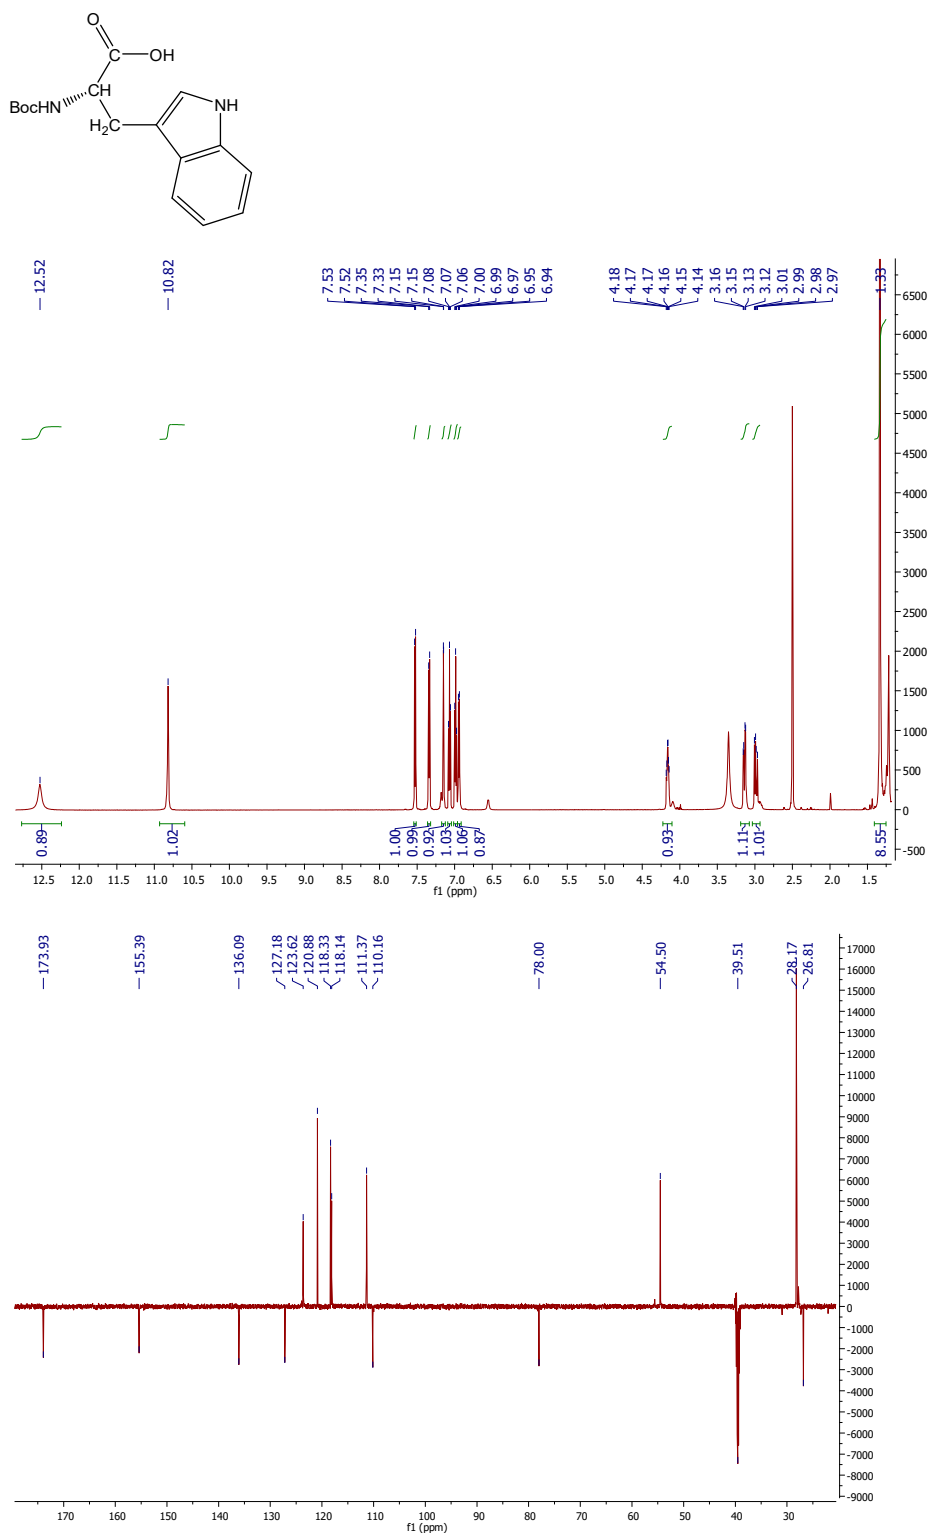

**Figure S8.**  $^1\text{H}$  NMR (600 MHz,  $\text{DMSO}-d_6$ ) and  $^{13}\text{C}$  NMR (151 MHz,  $\text{DMSO}-d_6$ ) spectra of compound **8**.



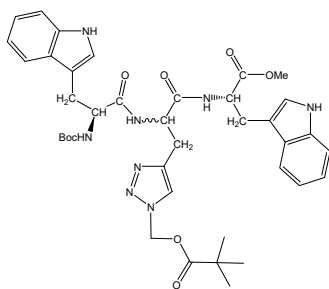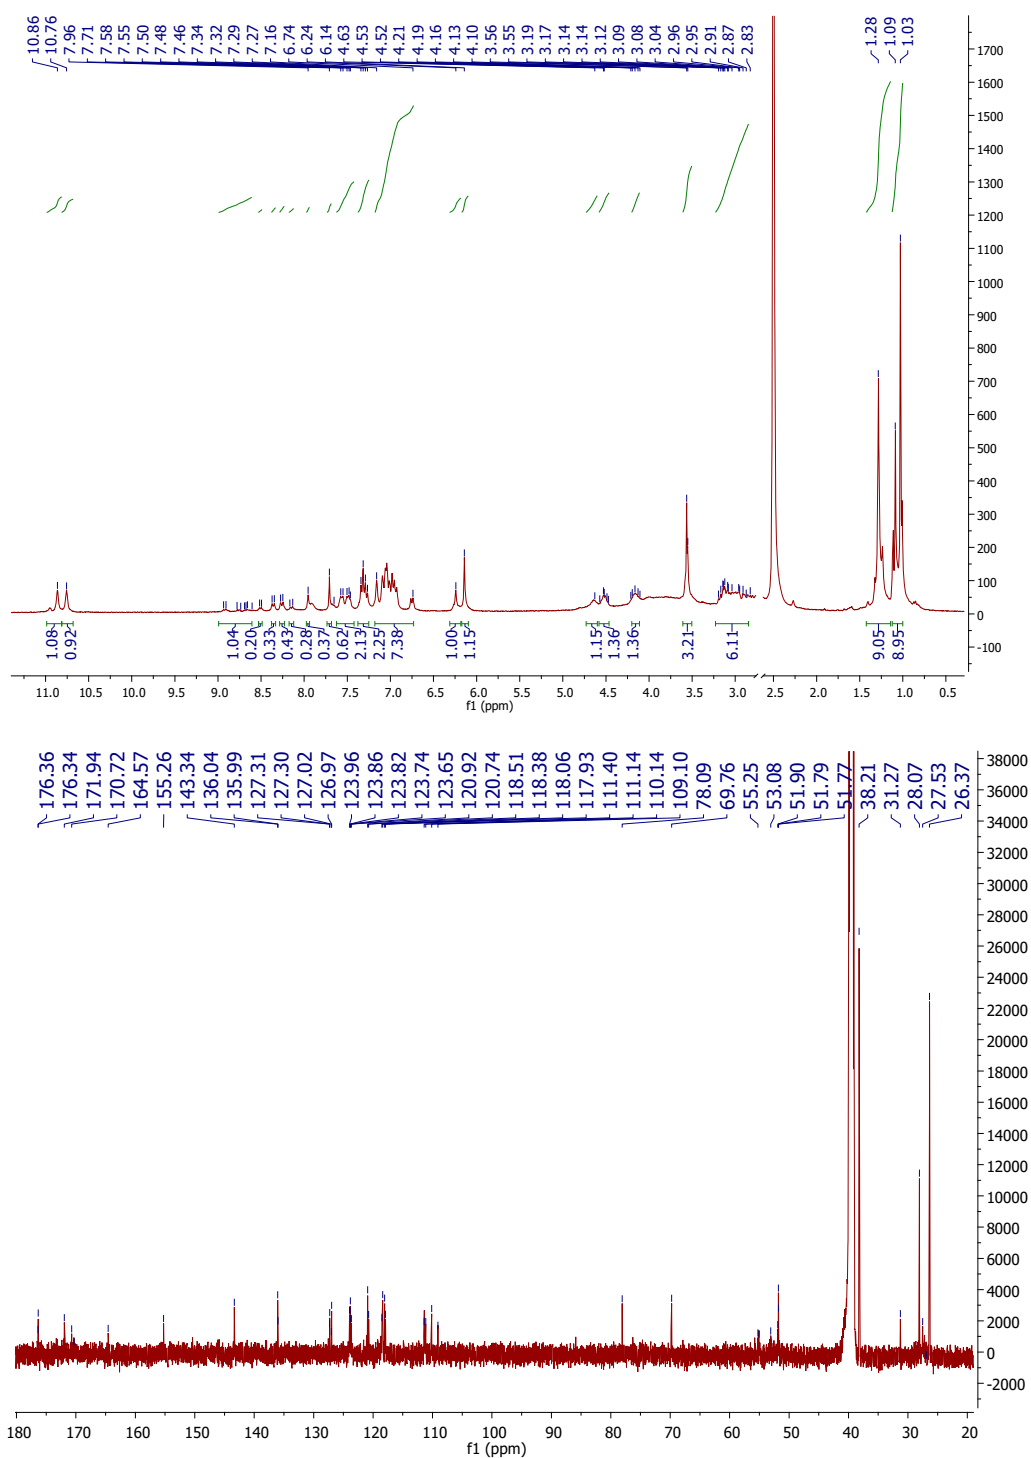



**Figure S9.**  $^1\text{H}$  NMR (300 MHz,  $\text{DMSO-}d_6$ ) and  $^{13}\text{C}$  NMR (151 MHz,  $\text{DMSO-}d_6$ ) spectra of compound **9**.

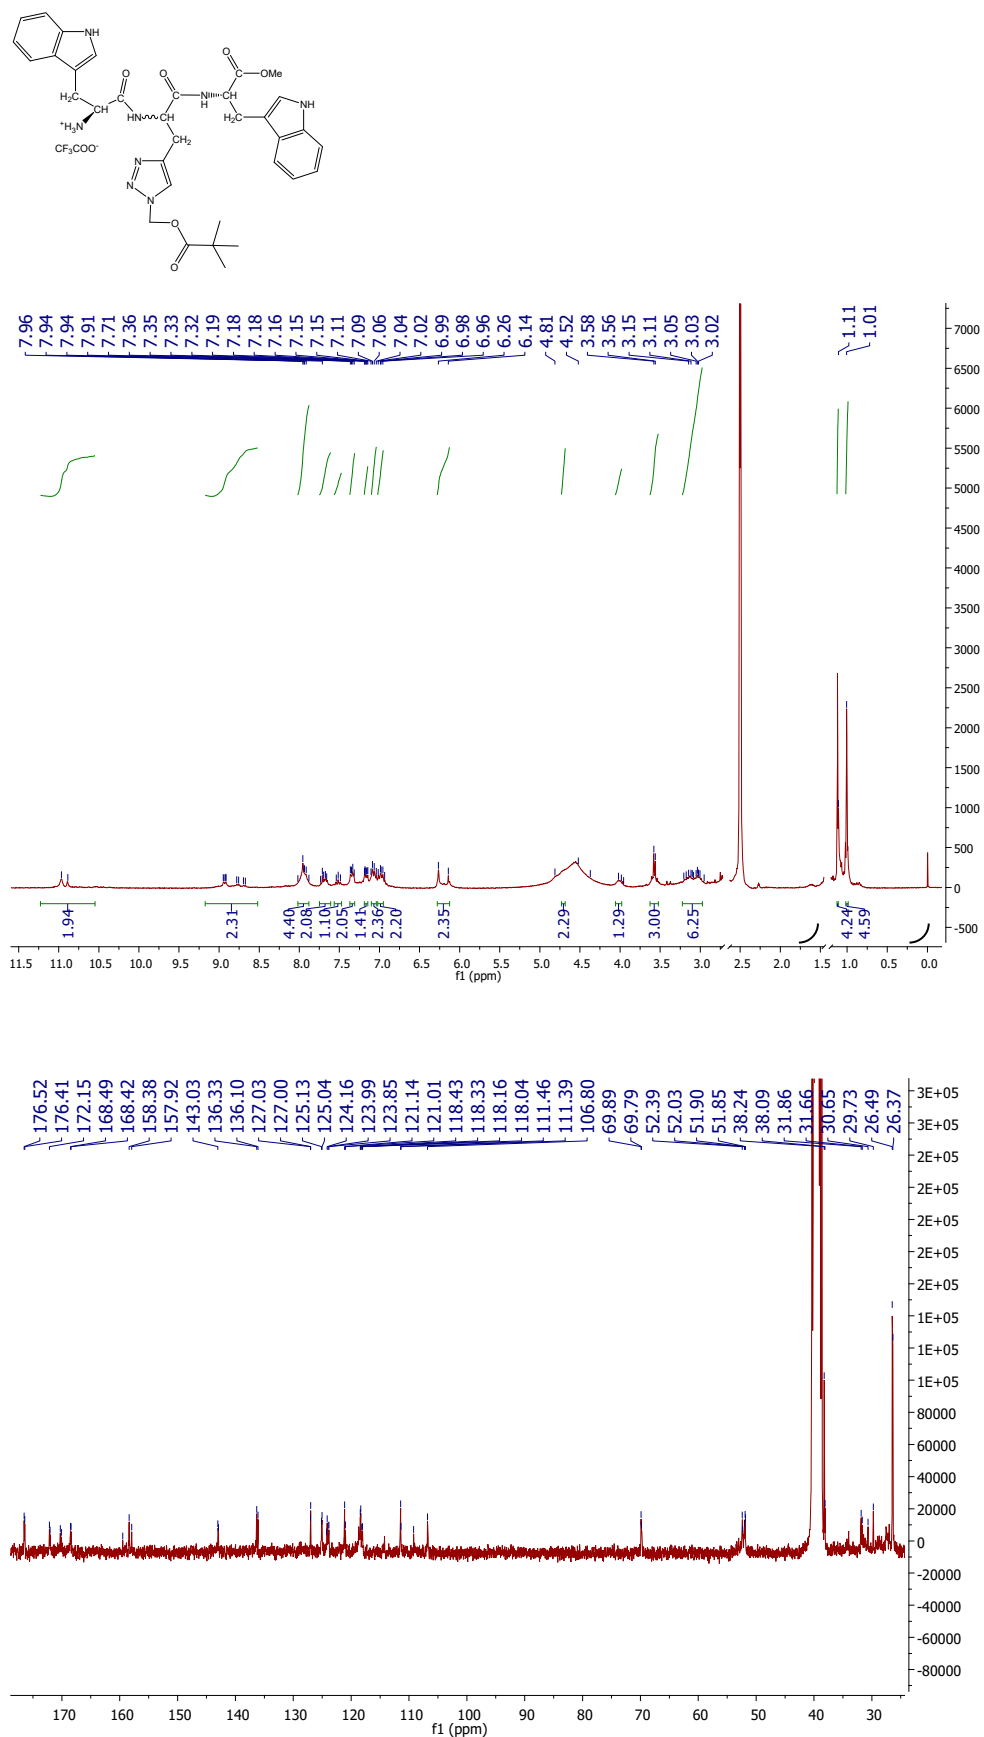

**Figure S10.**  $^1\text{H}$  NMR (300 MHz, DMSO-*d*<sub>6</sub>) and  $^{13}\text{C}$  NMR (75 MHz, DMSO-*d*<sub>6</sub>) spectra of compound **10**.



## 2. Physico-chemical properties of aqueous solutions

All compounds were dissolved in DMSO at  $c=10^{-3}$  M. The stock solutions were stored at +4 °C. No visible precipitation in working solutions was noticed. The experiments were performed in buffer solution (sodium cacodylate buffer,  $I = 50$  mM, pH = 7.0).

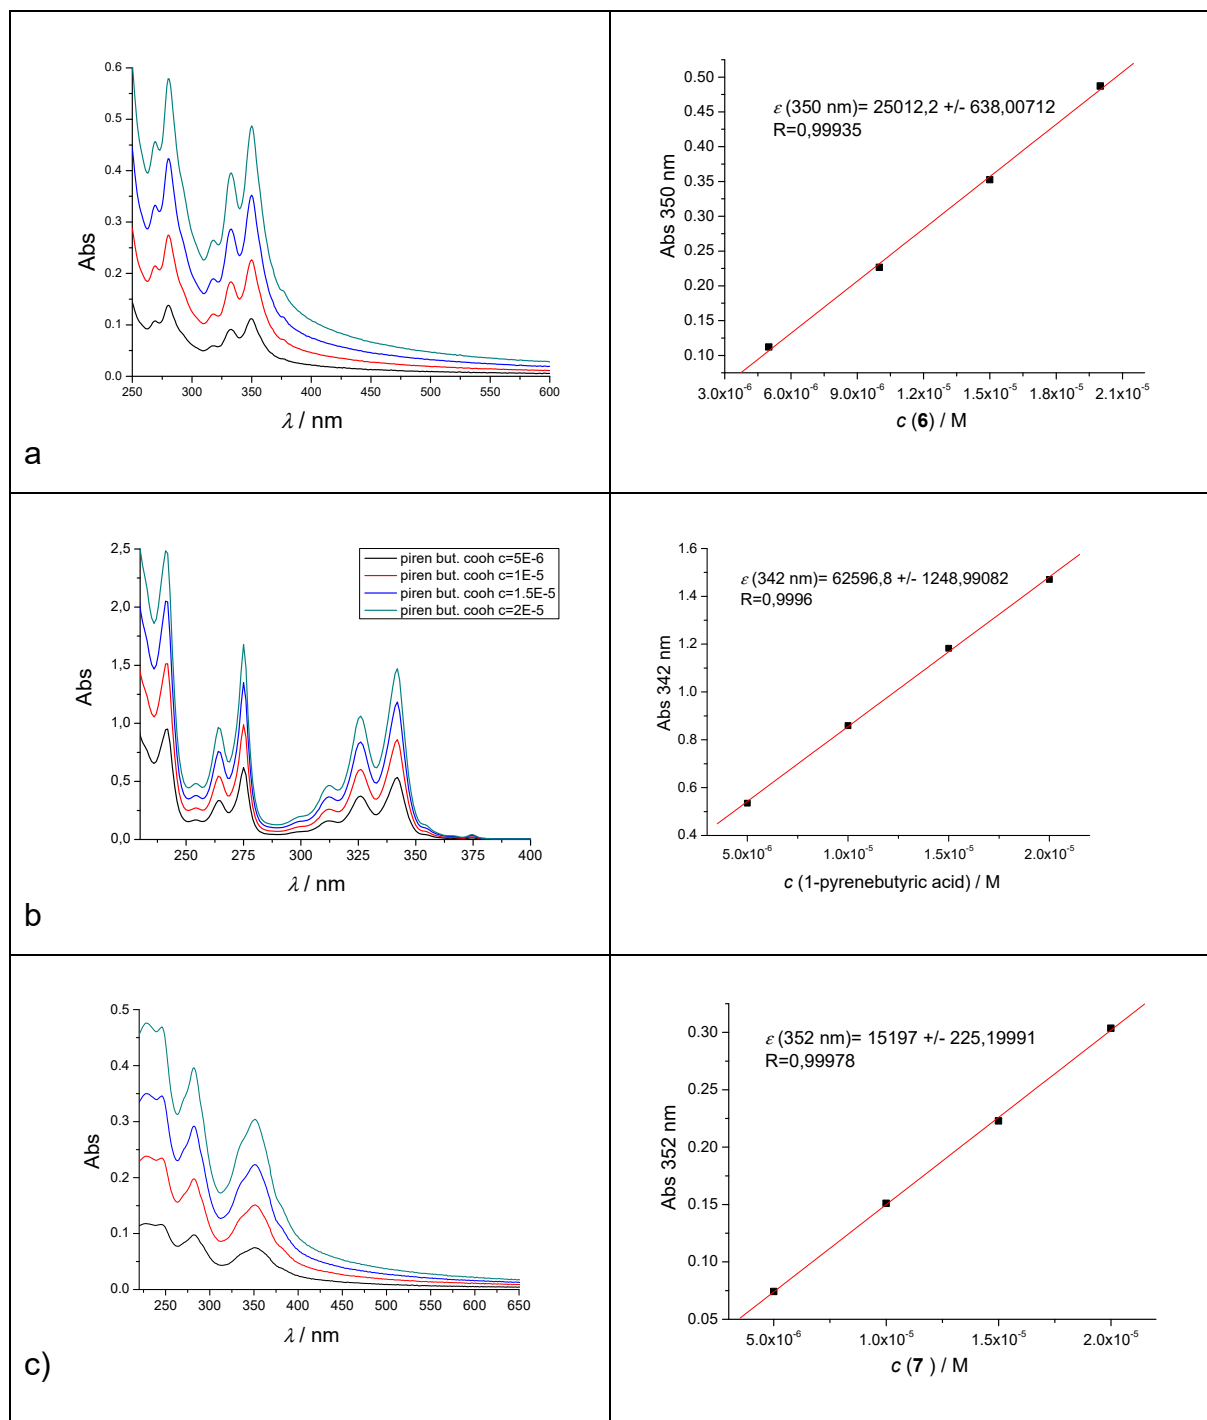

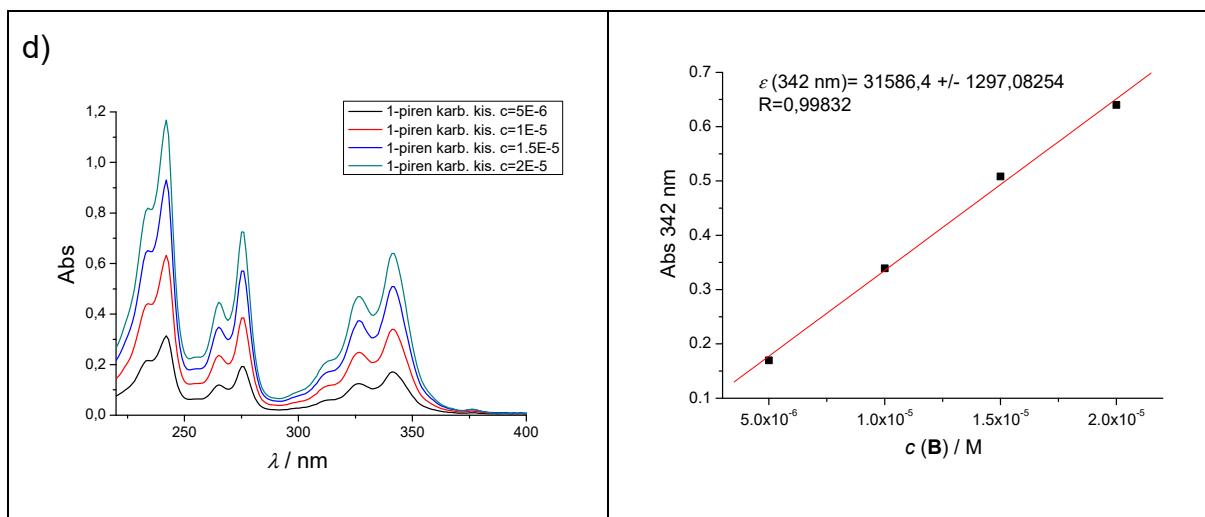

Figure S11. Concentration dependence of a) **6** and b) 1-pyrenebutyric acid (**A**) ; c) **7** and d) 1-pyrene carboxylic acid (**B**) in buffered solution pH 7,  $I = 0.05$  M. in buffered solution pH 7,  $I = 0.05$  M.

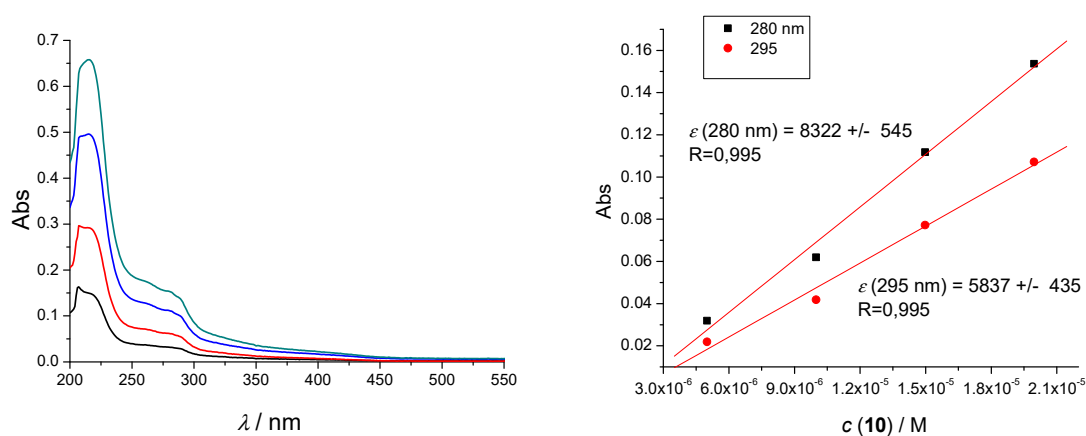

Figure S12. Concentration dependence (concentration range from  $5 \times 10^{-6}$  –  $2 \times 10^{-5}$  mol  $\text{dm}^{-3}$ ) of **K14** in buffered solution pH 7,  $I = 0.05$  mol  $\text{dm}^{-3}$ .

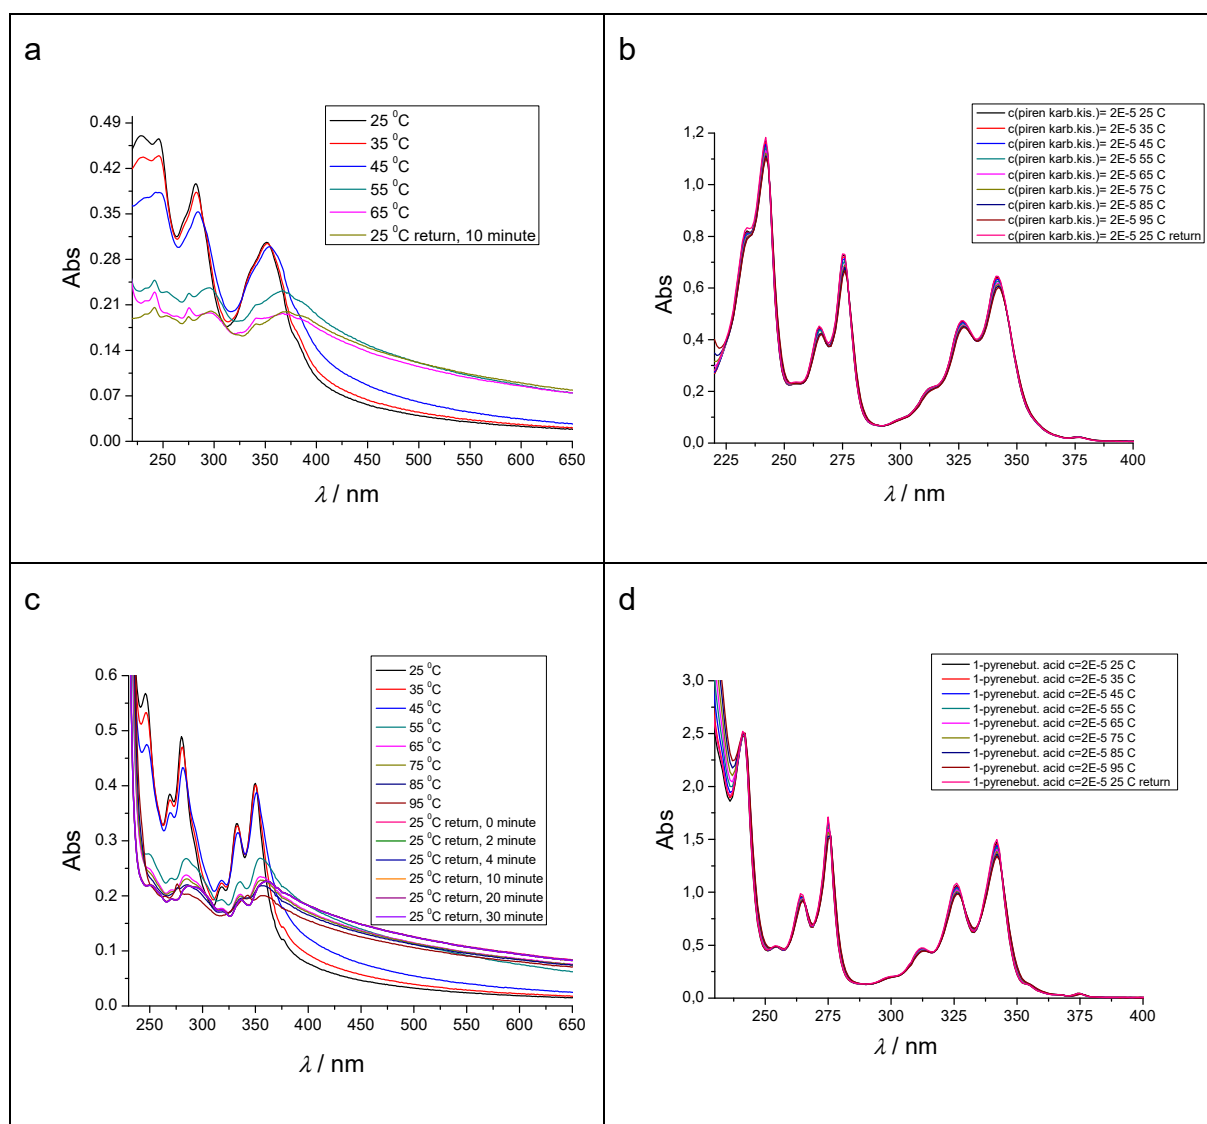

Figure S13. Temperature dependence of the UV/Vis spectra of a) **7**, b) 1-pyrenecarboxylic acid (**B**), c) **6** and d) 1-pyrenebutyric acid (**A**) ( $c = 2 \times 10^{-5}$  M) in buffered solution pH 7,  $I = 0.05$  M.

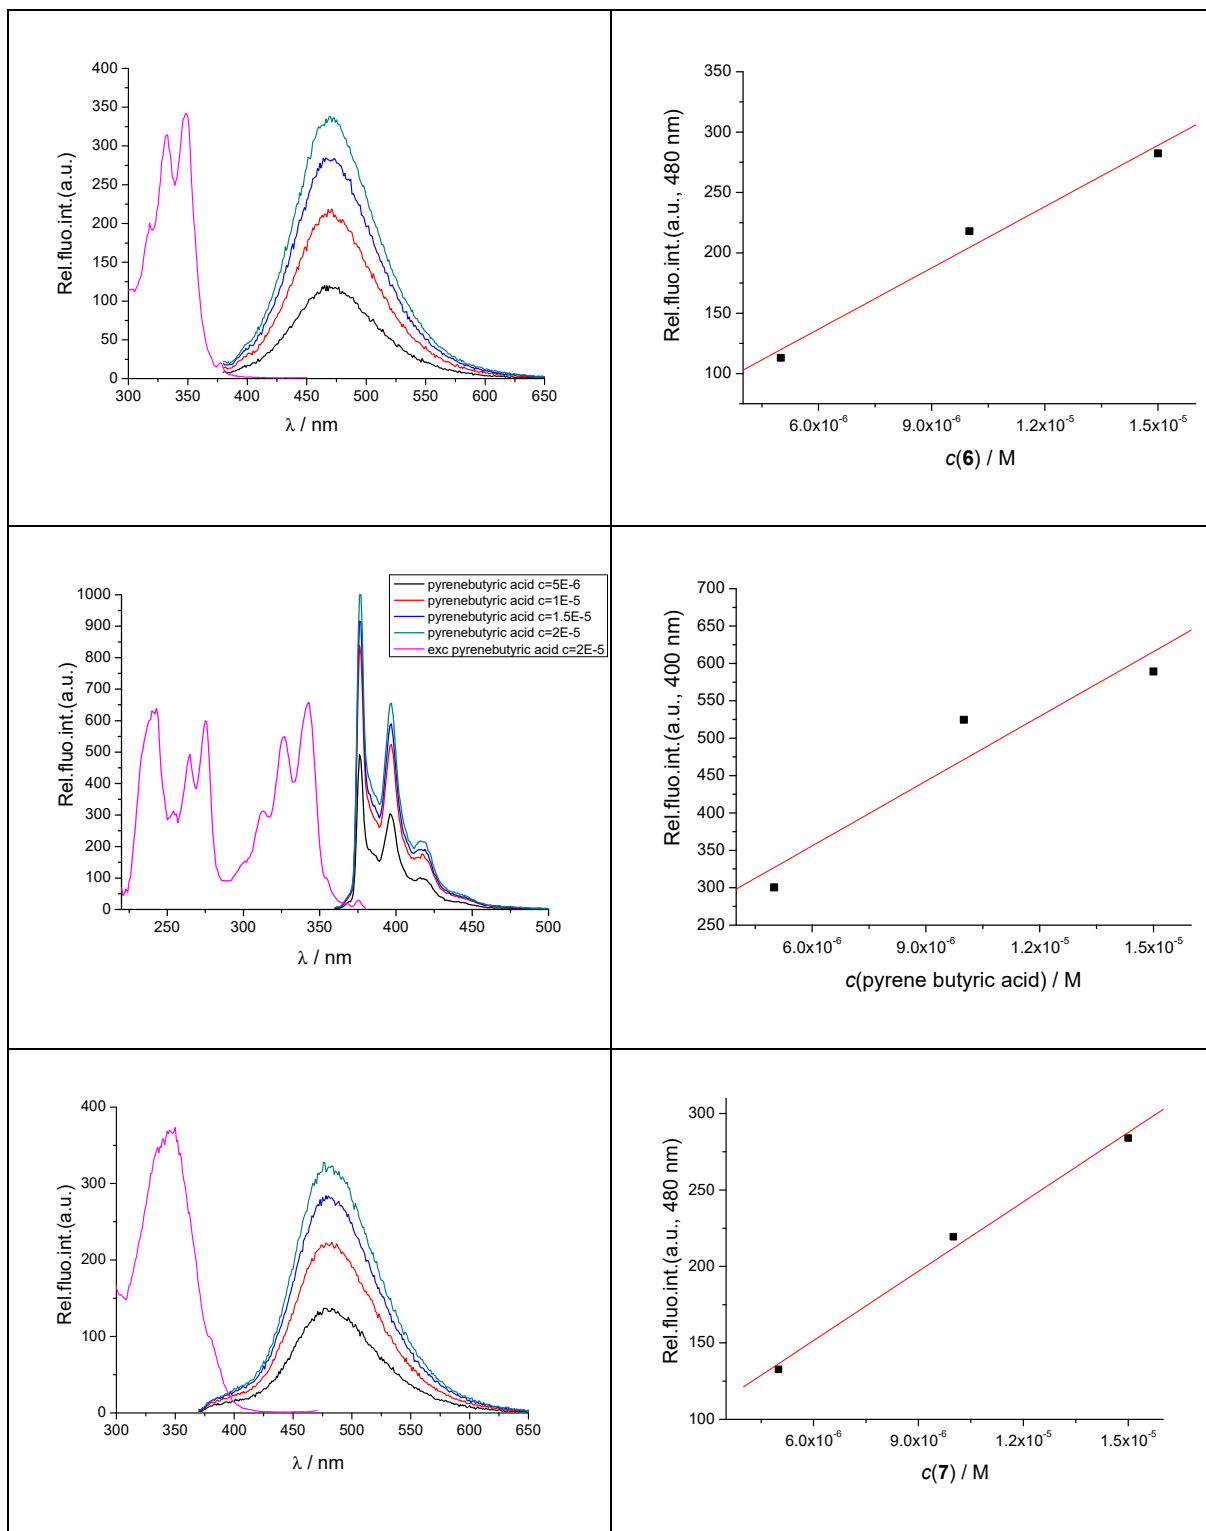

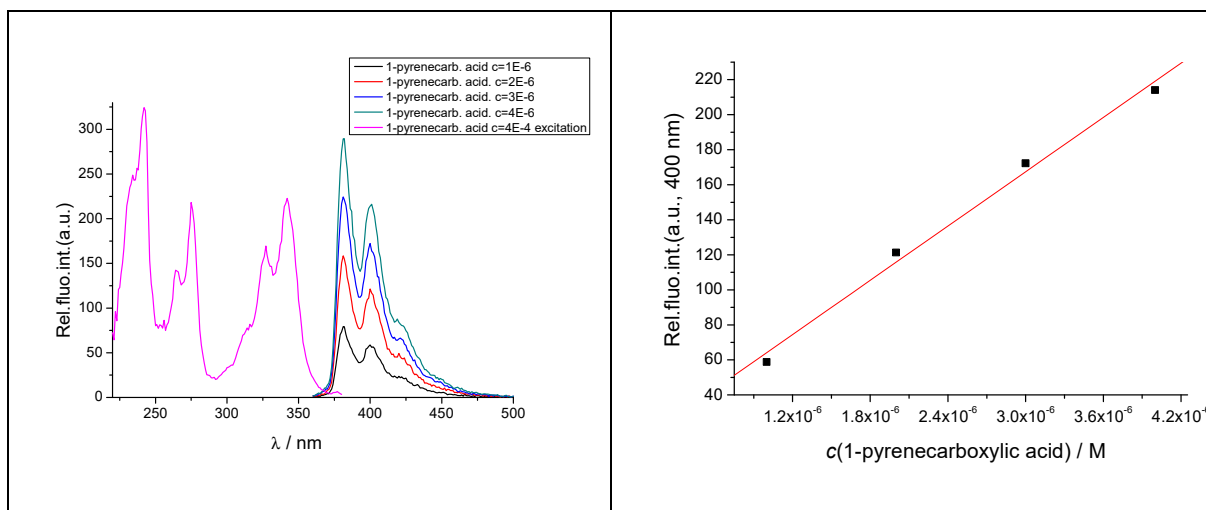

Figure S14. Fluorescence spectra of a) **6** ( $\lambda_{\text{exc}} = 350$  nm) at concentration range from  $5 \times 10^{-6}$ – $1.5 \times 10^{-5}$  M) and b) 1-pyrenebutyric acid (**A**) ( $\lambda_{\text{exc}} = 342$  nm) at concentration range from ( $5 \times 10^{-6}$ – $1.5 \times 10^{-5}$  M), c) **7** ( $\lambda_{\text{exc}} = 352$  nm) at concentration range from  $5 \times 10^{-6}$ – $1.5 \times 10^{-5}$  M) and d) 1-pyrenecarboxylic acid (**B**) ( $\lambda_{\text{exc}} = 341$  nm) at concentration range from ( $1 \times 10^{-6}$ – $4 \times 10^{-6}$  M), in buffer sodium cacodylate (pH 7.0,  $I = 0.05$  M). Pink lines in the range 300 – 400 nm are excitation spectra collected at emission maximum.

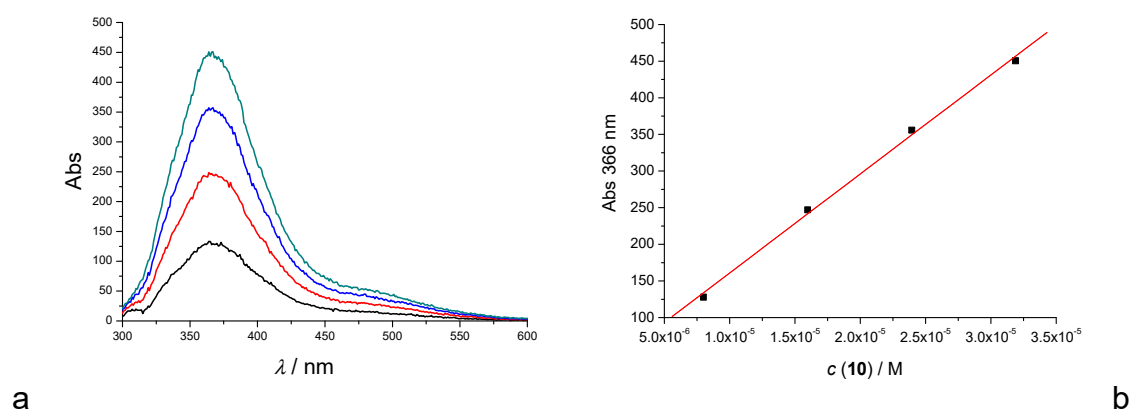

Figure S15. a) Fluorescence spectra of **10** ( $\lambda_{\text{exc}} = 280$  nm) at b) concentration range  $2 \times 10^{-6}$ – $8 \times 10^{-6}$  M, in buffer sodium cacodylate (pH 7.0,  $I = 0.05$  M).



## Time Resolved Fluorescence, TCSPC (Time Correlated Single Photon Counting)

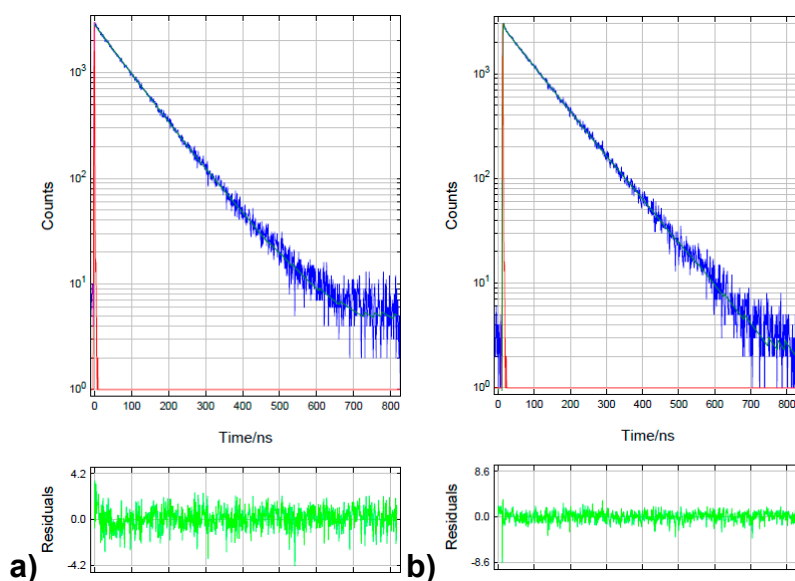

Figure S16. Data of fluorescence decay of **1-pyrenebutyric acid (A)** obtained by the Time Correlated Single-Photon Counting technique in **a)** non-degassed and **b)** degassed solution at  $\lambda_{exc} = 340$  nm and  $\lambda_{em} = 419$  nm. Done at pH 7.0, sodium cacodylate buffer,  $I = 0.05$  M. Number of channels used in the fitting 1024 and 3000 cps. The instrument response function (IRF) was measured with an aqueous suspension of Silica Gel at the same conditions as decay. Fluorescence decay (lifetime), their relative representation and statistical parameter  $\chi^2$  are given in Table 1.

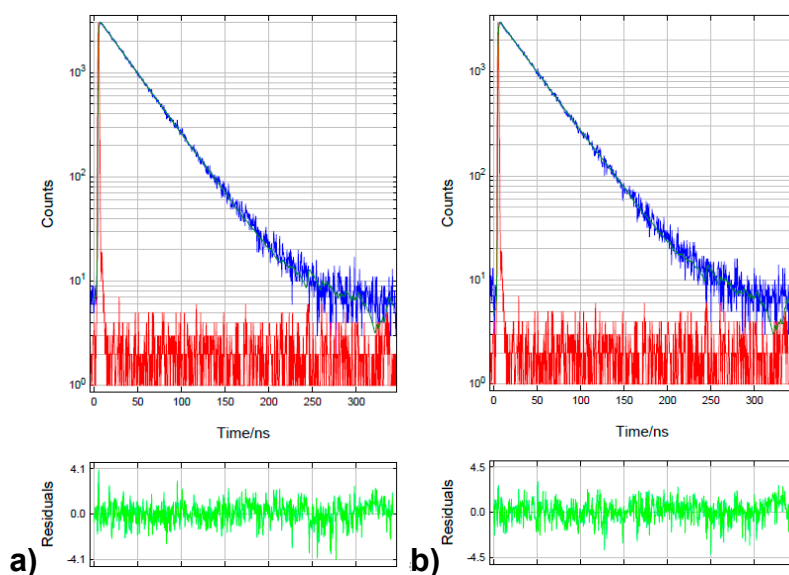

Figure S17. Data of fluorescence decay of **1-pyrenecarboxylic acid (B)** obtained by the Time Correlated Single-Photon Counting technique in **a)** non-degassed and **b)** degassed solution at  $\lambda_{exc} = 340$  nm and  $\lambda_{em} = 400$  nm at pH 7.0, sodium cacodylate buffer,  $I = 0.05$  M. Number of channels used in the fitting 1024 and 3000 cps. The instrument response function (IRF) was measured with an aqueous suspension of Silica Gel at the same conditions as decay. Fluorescence decay (lifetime), their relative representation and statistical parameter  $\chi^2$  are given in Table 1.

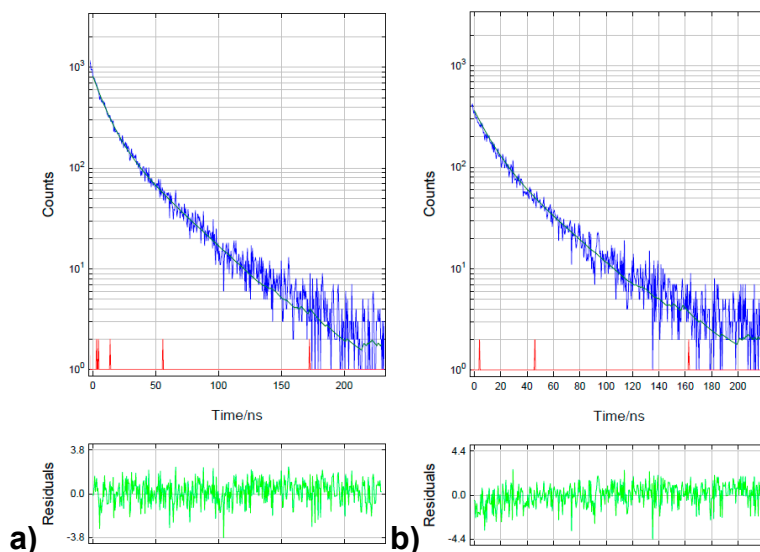

Figure S18. Data of fluorescence decay of **6** acid obtained by the Time Correlated Single-Photon Counting technique in **a)** non-degassed and **b)** degassed solution at  $\lambda_{\text{exc}} = 340$  nm and  $\lambda_{\text{em}} = 471$  nm at pH 7.0, sodium cacodylate buffer,  $I = 0.05$  M. Number of channels used in the fitting 1024 and 3000 cps. The instrument response function (IRF) was measured with an aqueous suspension of Silica Gel at the same conditions as decay. Fluorescence decay (lifetime), their relative representation and statistical parameter  $\chi^2$  are given in Table 1.

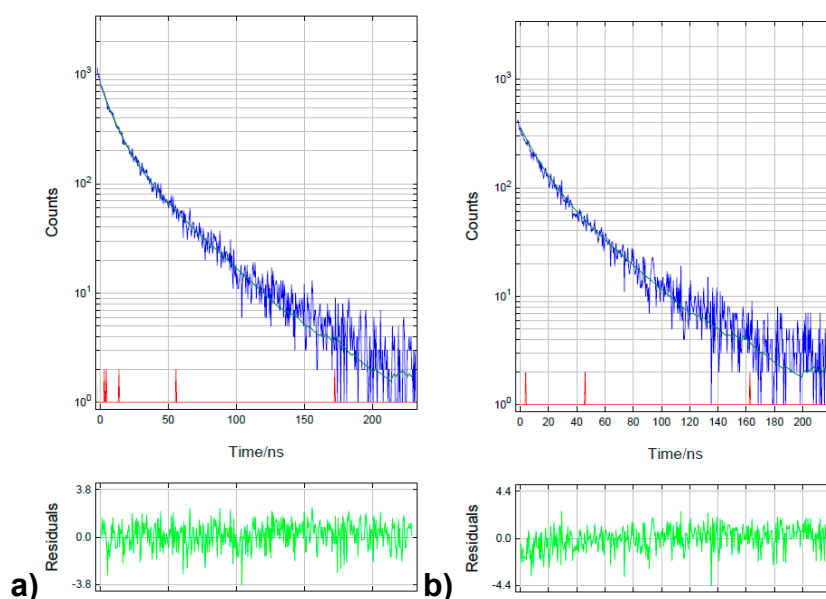

Figure S19. Data of fluorescence decay of **7** acid obtained by the Time Correlated Single-Photon Counting technique in **a)** non-degassed and **b)** degassed solution at  $\lambda_{\text{exc}} = 340$  nm and  $\lambda_{\text{em}} = 472$  nm at pH 7.0, sodium cacodylate buffer,  $I = 0.05$  M. Number of channels used in the fitting 1024 and 3000 cps. The instrument response function (IRF) was measured with an aqueous suspension of Silica Gel at the same conditions as decay. Fluorescence decay (lifetime), their relative representation and statistical parameter  $\chi^2$  are given in Table 1.

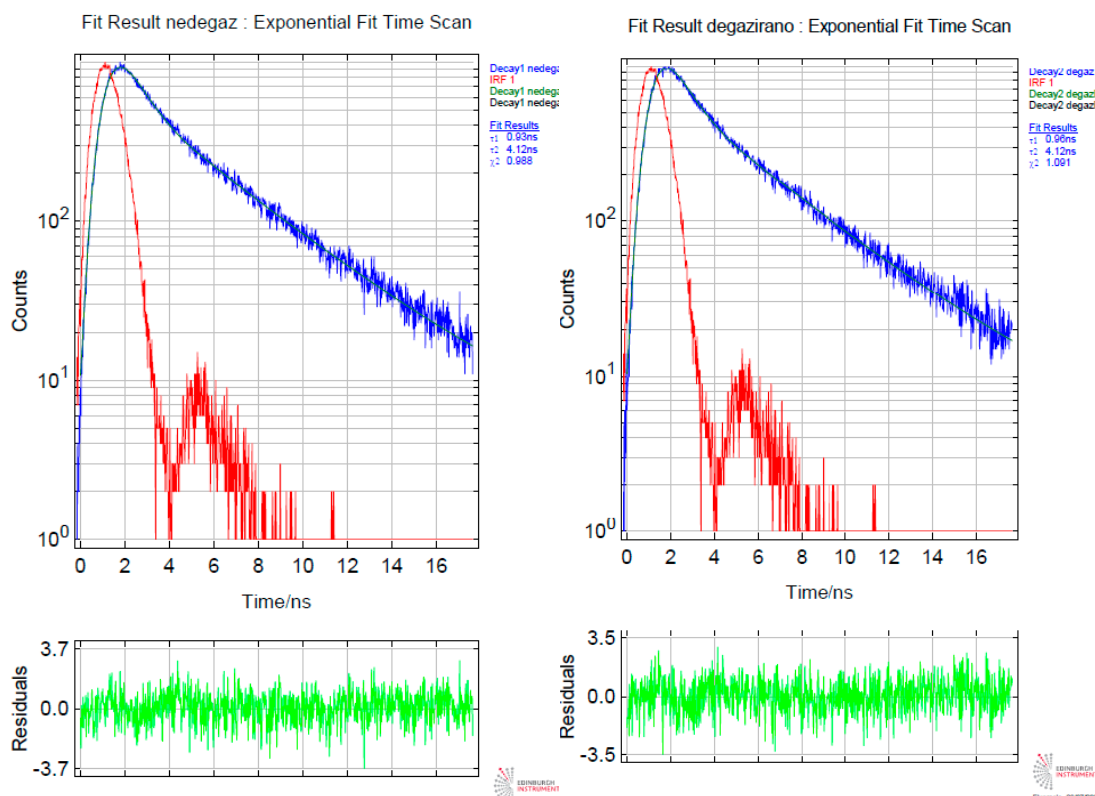

Figure S20. Data of fluorescence decay of **10** acid obtained by the Time Correlated Single-Photon Counting technique in **a)** non-degassed and **b)** degassed solution at  $\lambda_{\text{exc}} = 280$  nm and  $\lambda_{\text{em}} = 380$  nm at pH 7.0, sodium cacodylate buffer,  $I = 0.05$  M. Number of channels used in the fitting 1024 and 3000 cps. The instrument response function (IRF) was measured with an aqueous suspension of Silica Gel at the same conditions as decay. Fluorescence decay (lifetime), their relative representation and statistical parameter  $\chi^2$  are given in Table 1.

**Table S1.** Lifetime data obtained by measuring lifetime decay of degassed **6** and **7**, and their complexes with ctDNA and with  $\text{CuCl}_2$ .

|                            | <b>6</b>     | <b>6 + ctDNA</b> | <b>6 + <math>\text{CuCl}_2</math></b> |
|----------------------------|--------------|------------------|---------------------------------------|
| <b><math>\tau_1</math></b> | 2.682E-009 s | 2.618E-009 s     | 2.241E-009 s                          |
| <b><math>\tau_2</math></b> | 1.034E-008 s | 1.174E-008 s     | 9.496E-009 s                          |
| <b><math>\tau_3</math></b> | 3.548E-008 s | 3.703E-008 s     | 3.374E-008 s                          |
|                            | <b>7</b>     | <b>7 + ctDNA</b> | <b>7 + <math>\text{CuCl}_2</math></b> |
| <b><math>\tau_1</math></b> | 2.541E-009 s | 2.720E-009 s     | 2.774E-009 s                          |
| <b><math>\tau_2</math></b> | 1.311E-008 s | 1.320E-008 s     | 1.327E-008 s                          |
| <b><math>\tau_3</math></b> | 3.693E-008 s | 3.842E-008 s     | 3.587E-008 s                          |

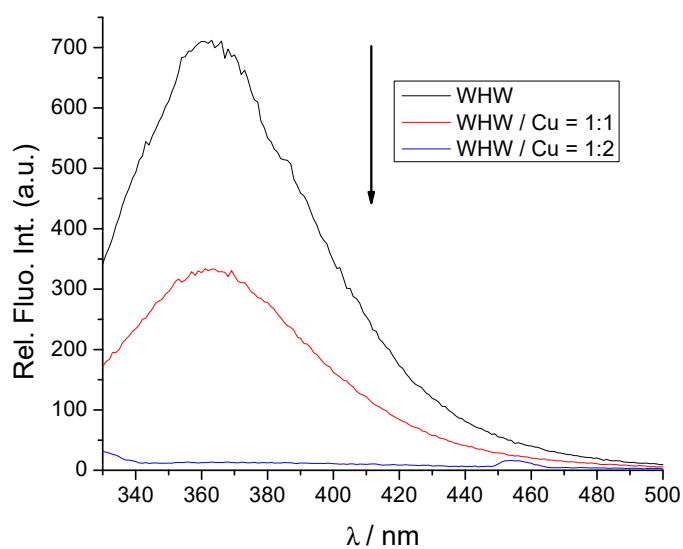

**Figure S21.** Fluorimetric titration of **WHW** ( $c = 5 \times 10^{-6}$  M ;  $\lambda_{\text{exc}} = 295$  nm) with  $\text{CuCl}_2$ . Done at pH = 7.0, sodium cacodylate buffer,  $I = 0.05$  M.



### 3. Study of interactions with double-stranded DNA/RNA

#### Structural properties of studied DNA and RNA

Polynucleotides were purchased as noted: poly dGdC – poly dGdC, poly dAdT – poly dAdT, poly A – poly U, *calf thymus* (ct)-DNA (Aldrich) and dissolved in sodium cacodylate buffer,  $I = 0.05$  M, pH=7.0. The ct-DNA was additionally sonicated and filtered through a 0.45 mm filter to obtain mostly short (ca. 100 base pairs) rod-like B-helical DNA fragments [[7]]. The polynucleotide concentration was determined spectroscopically [[8]] as the concentration of phosphates (corresponds to  $c(\text{nucleobase})$ ).

**Table S2.** Groove widths and depths for selected nucleic acid conformation [9,10].

| Structure type                    | Groove width [Å] |            | Groove depth [Å] |            |
|-----------------------------------|------------------|------------|------------------|------------|
|                                   | major            | minor      | major            | minor      |
| [a] poly rA – poly rU (AU-RNA)    | <b>3.8</b>       | 10.9       | <b>13.5</b>      | 2.8        |
| [b] ct-DNA (48% of GC-pairs)      | 11.4             | 3.3        | 7.5              | 7.9        |
| [b] poly dAdT – poly dAdT(AT-DNA) | 11.2             | <b>6.3</b> | 8.5              | <b>7.5</b> |
| [c] poly dGdC – poly dGdC         | 13.5             | 9.5        | 10.0             | 7.2        |

[a] A - helical structure

[b] B - helical structure

[c] B- helical structure with minor groove sterically blocked by amino groups of guanines

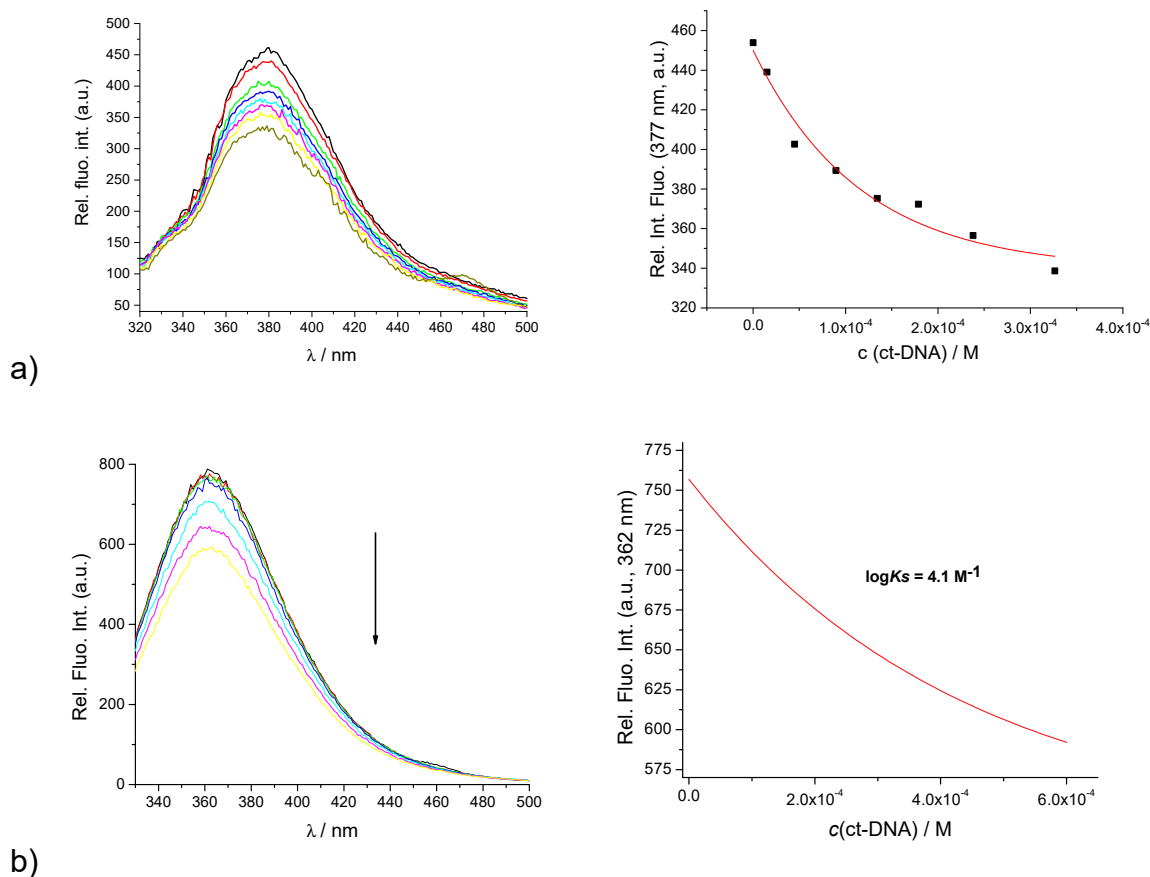

Figure S22. a) Fluorimetric titration of **10** ( $c = 5 \times 10^{-6} \text{ M}$ ;  $\lambda_{\text{exc}} = 295 \text{ nm}$ ) with ctDNA. RIGHT: dependence of fluorescence at  $\lambda_{\text{max}} = 377 \text{ nm}$  on  $c(\text{ctDNA})$ . b) Fluorimetric titration of **WHW** ( $c = 5 \times 10^{-6} \text{ M}$ ;  $\lambda_{\text{exc}} = 295 \text{ nm}$ ) with ctDNA. RIGHT: dependence of fluorescence at  $\lambda_{\text{max}} = 362 \text{ nm}$  on  $c(\text{ctDNA})$ . Done at pH 7, sodium cacodylate buffer,  $I = 0.05 \text{ M}$ . Red line: fitting titration data to Scatchard eq.;  $n=0.2$ .

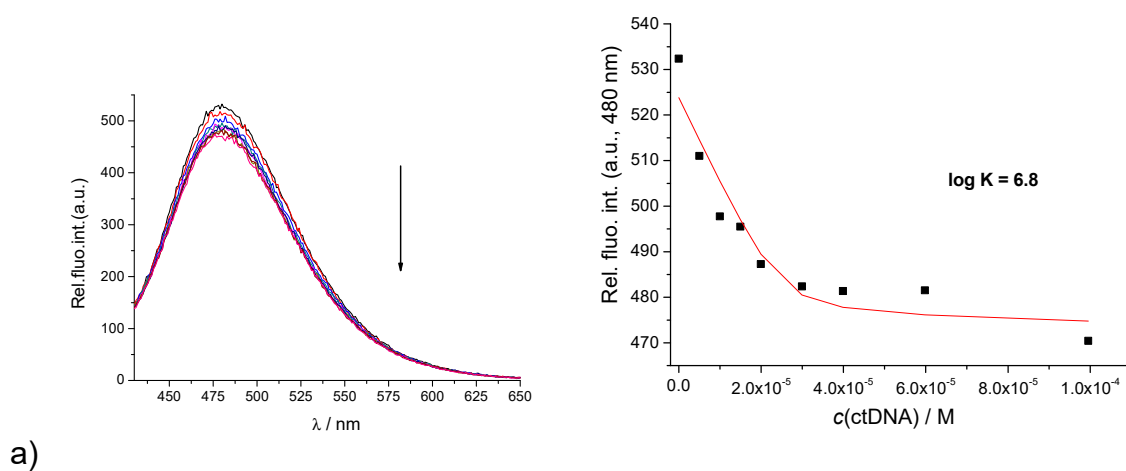

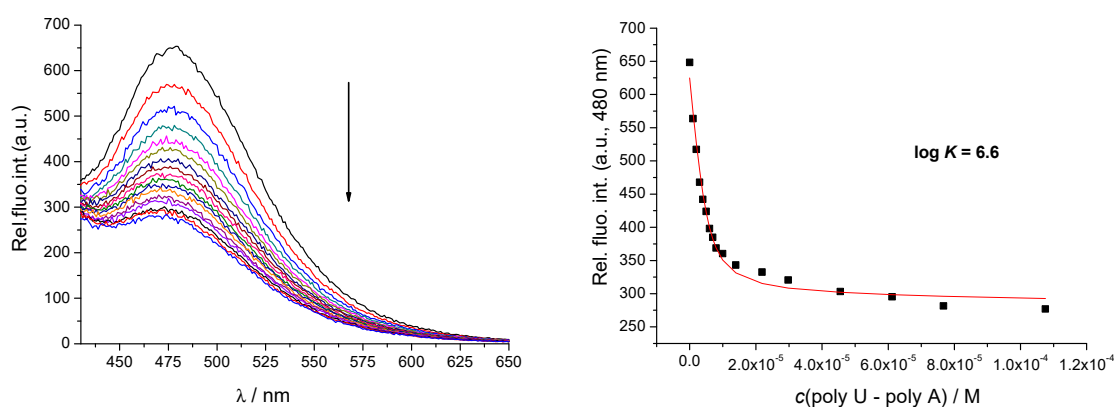

b)

Figure S23. Fluorimetric titration of **7** ( $c = 5 \times 10^{-6}$  M ;  $\lambda_{\text{exc}} = 352$  nm) a) with ctDNA. RIGHT: dependence of fluorescence at  $\lambda_{\text{max}} = 480$  nm on  $c(\text{ctDNA})$ . b) with poly A – poly U. RIGHT: dependence of fluorescence at  $\lambda_{\text{max}} = 480$  nm on  $c(\text{pApU})$ . Done at pH 7, sodium cacodylate buffer,  $I = 0.05$  M.

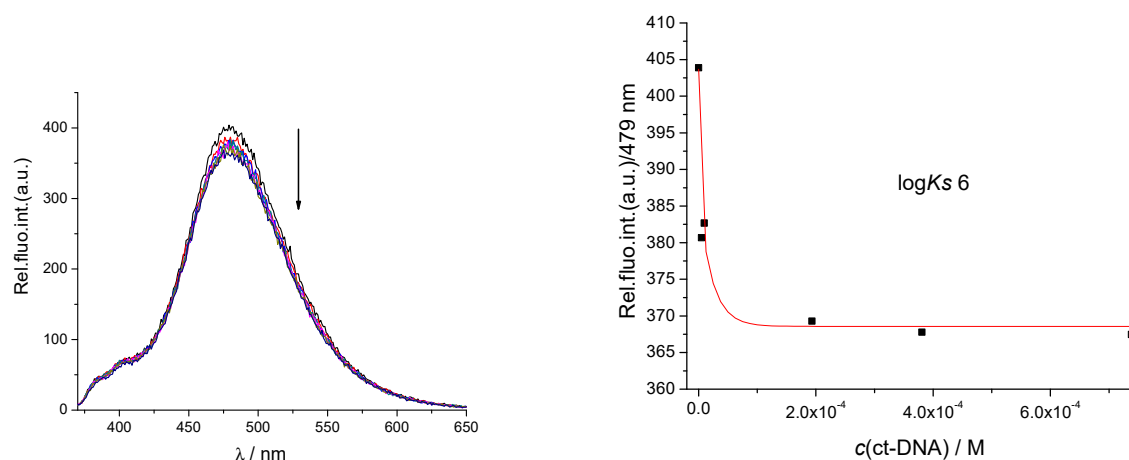

Figure S24. Fluorimetric titration of **7**/ $\text{Cu}^{2+}$  complex ( $c(\mathbf{7}) = 5 \times 10^{-6} \text{ M}$ ;  $\lambda_{\text{exc}} = 352 \text{ nm}$ ) with ctDNA. RIGHT: dependence of fluorescence at  $\lambda_{\text{max}} = 479 \text{ nm}$  on  $c(\text{ctDNA})$ . Done at pH 7, sodium cacodylate buffer,  $I = 0.05 \text{ M}$ .

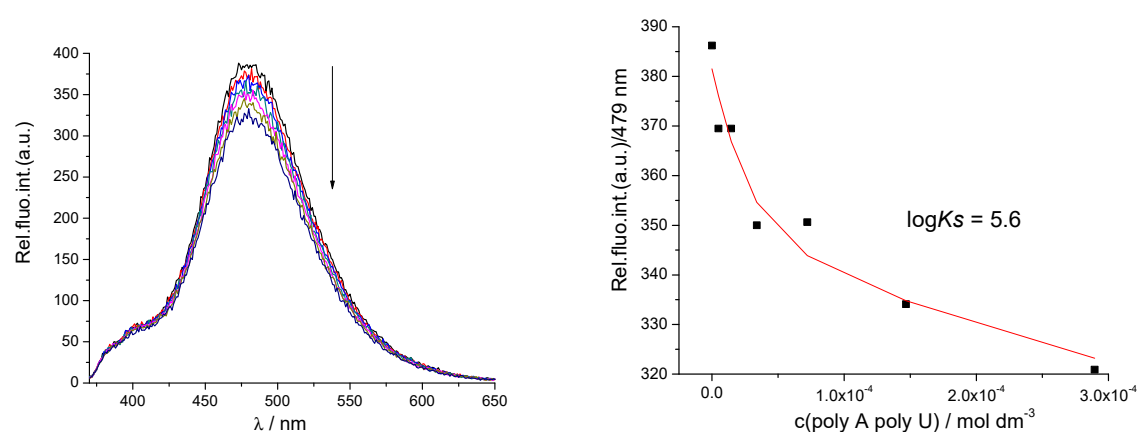

Figure S25. Fluorimetric titration of complex **7**/ $\text{Cu}^{2+}$  complex ( $c(\mathbf{7}) = 5 \times 10^{-6} \text{ M}$ ;  $\lambda_{\text{exc}} = 352 \text{ nm}$ ) with poly A poly U. RIGHT: dependence of fluorescence at  $\lambda_{\text{max}} = 479 \text{ nm}$  on  $c(\text{poly A poly U})$ . Done at pH 7, sodium cacodylate buffer,  $I = 0.05 \text{ M}$ .



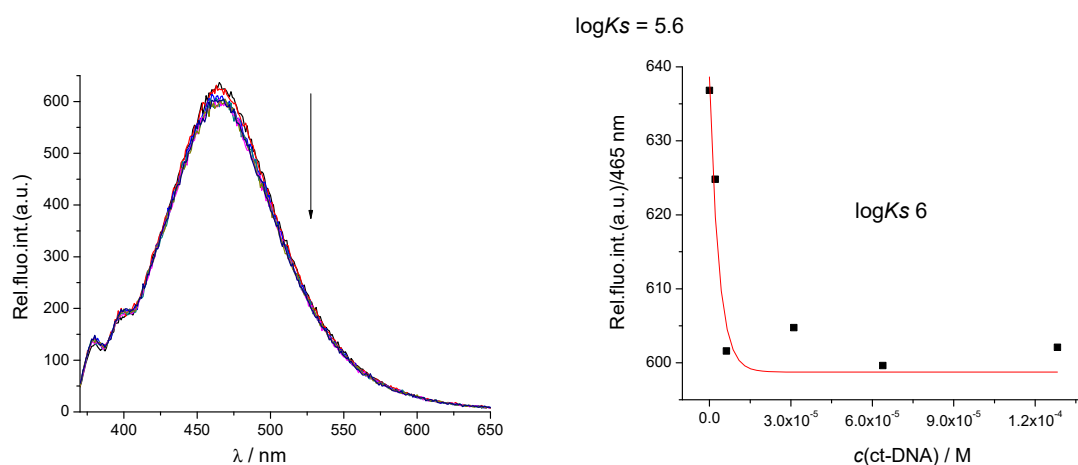

Figure S26. Fluorimetric titration of **6**/ $\text{Cu}^{2+}$  complex ( $c(\mathbf{6}) = 5 \times 10^{-6} \text{ M}$ ;  $\lambda_{\text{exc}} = 352 \text{ nm}$ ) with ct-DNA. RIGHT: dependence of fluorescence at  $\lambda_{\text{max}} = 465 \text{ nm}$  on  $c(\text{ctDNA})$ . Done at pH 7, sodium cacodylate buffer,  $I = 0.05 \text{ M}$ .

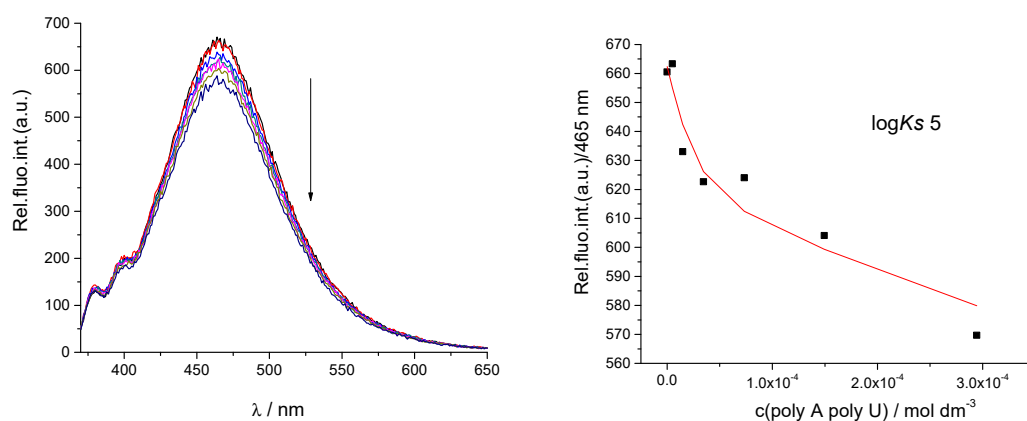

Figure S27. Fluorimetric titration of **6**/ $\text{Cu}^{2+}$  complex ( $c(\mathbf{6}) = 5 \times 10^{-6} \text{ M}$ ;  $\lambda_{\text{exc}} = 352 \text{ nm}$ ) with poly A poly U. RIGHT: dependence of fluorescence at  $\lambda_{\text{max}} = 465 \text{ nm}$  on  $c(\text{poly A poly U})$ . Done at pH 7, sodium cacodylate buffer,  $I = 0.05 \text{ M}$ .



## CD experiments

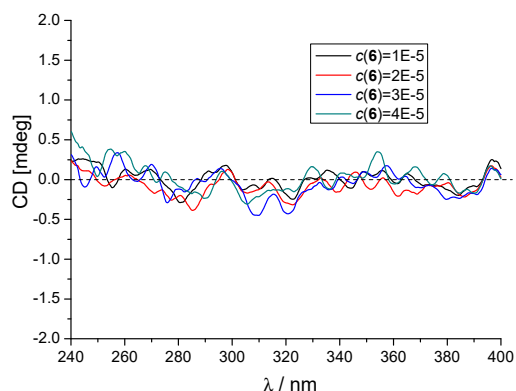

a)

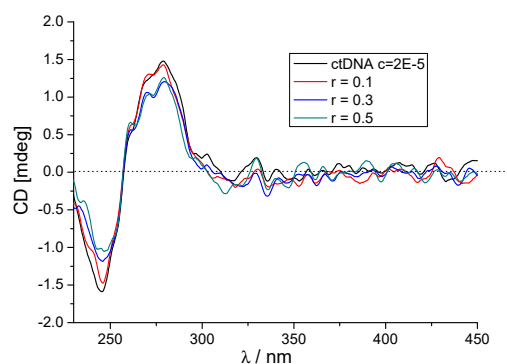

b)

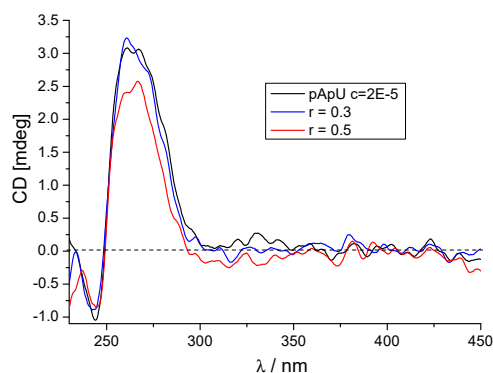

c)

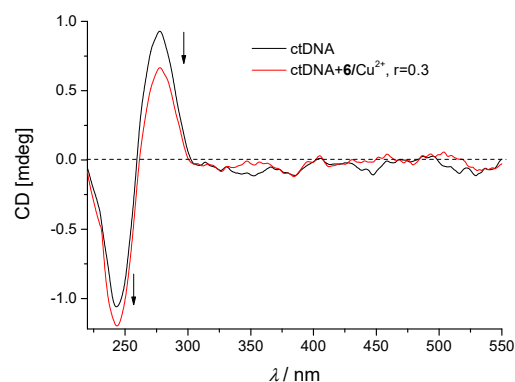

d)

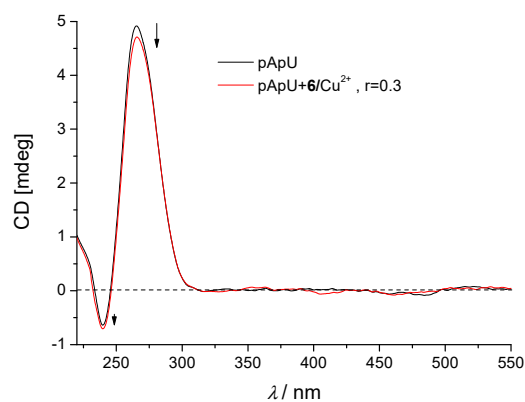

e)

Figure S28. CD spectra of: a) **6**  $c = 1 \times 10^{-5}$ – $4 \times 10^{-5}$  M. The CD titrations with **6** of b) ctDNA and c) poly A – poly U at molar ratios  $r = [\mathbf{6}] / [\text{polynucleotide}]$ ; the CD titrations with **6**/ $\text{Cu}^{2+}$  of d) ctDNA and e) poly A – poly U at  $r = [\mathbf{6}/\text{Cu}^{2+}] / [\text{polynucleotide}] = 0.3$ . Done at pH 7.0, buffer sodium cacodylate,  $I = 0.05$  M.

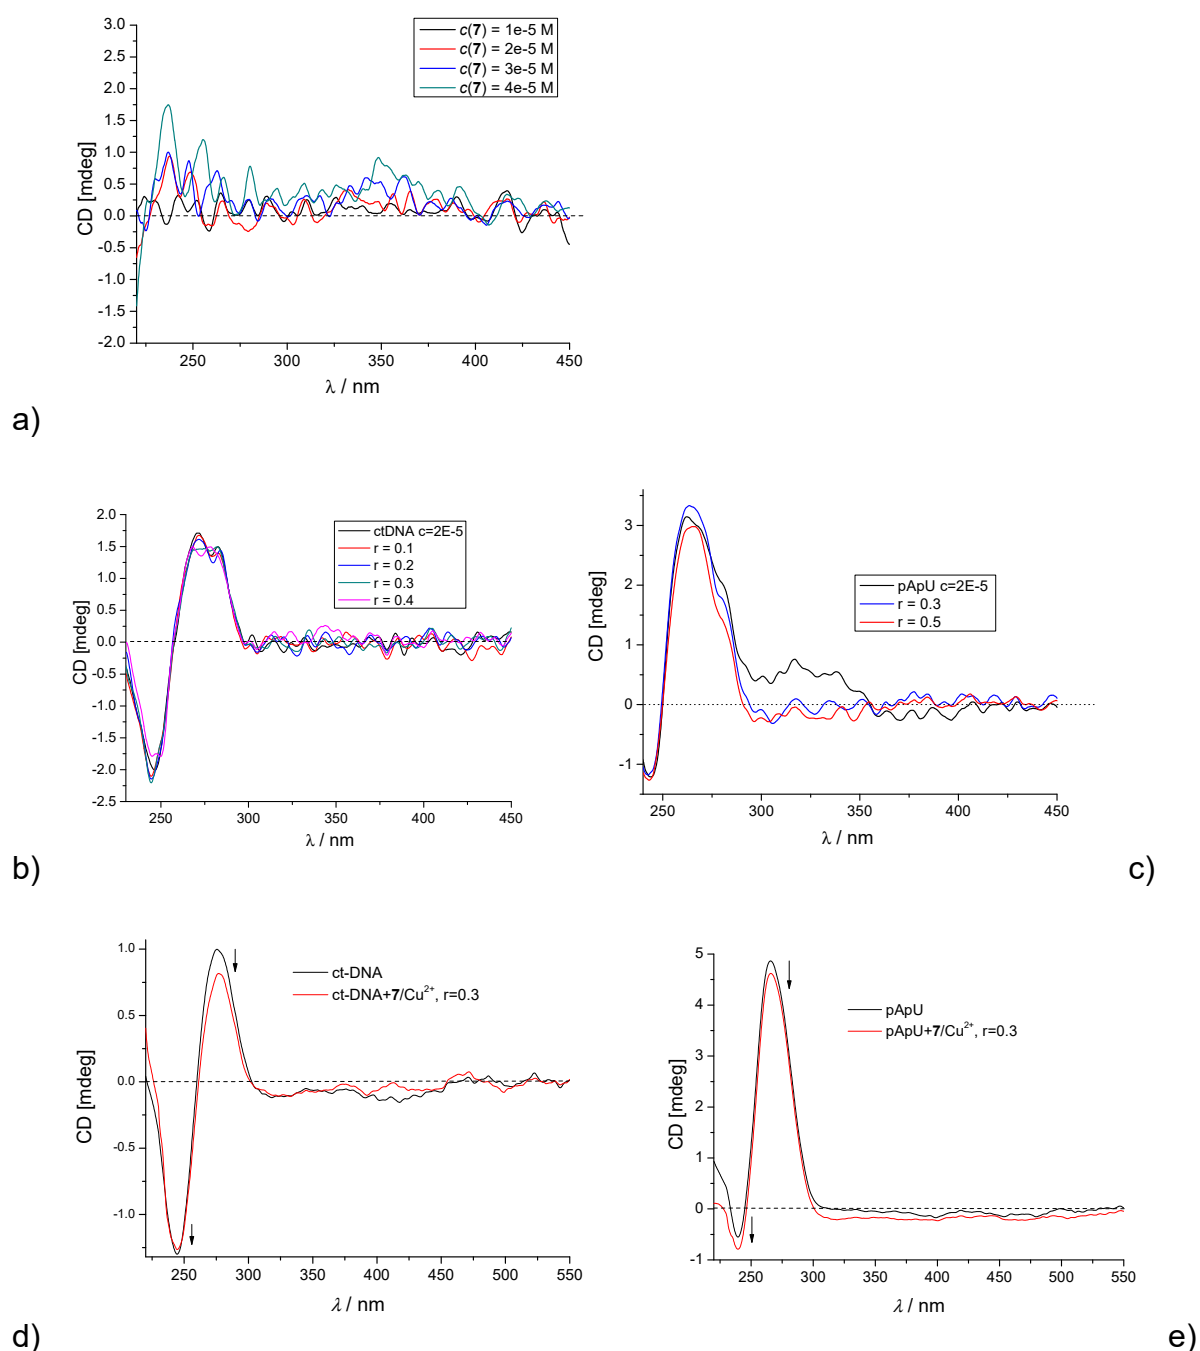

Figure S29. CD spectra of: a) **7**  $c = 1 \times 10^{-5}$ – $4 \times 10^{-5}$  M. The CD titrations with **7** of b) ct-DNA and c) poly A – poly U at molar ratios  $r = [\mathbf{7}] / [\text{polynucleotide}]$ ; the CD titrations with **7**/Cu<sup>2+</sup> of d) ctDNA and e) poly A – poly U at  $r = [\mathbf{7}/\text{Cu}^{2+}] / [\text{polynucleotide}] = 0.3$ . Done at pH 7.0, buffer sodium cacodylate,  $I = 0.05$  M.

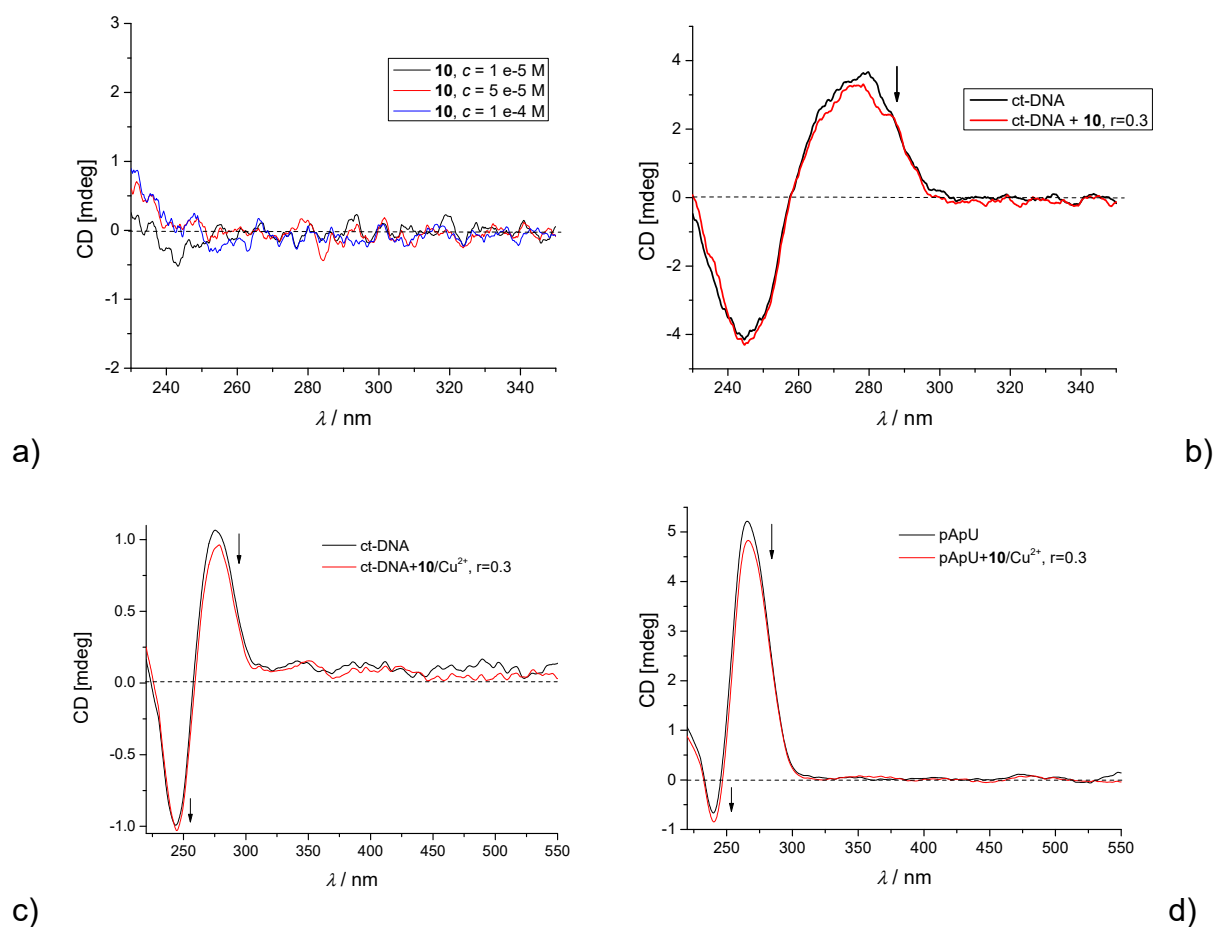

Figure S30. CD spectra of: a) **10**  $c = 1 \times 10^{-5} - 1 \times 10^{-4}$  M. CD titrations with **10** of b) ct-DNA at molar ratio  $r = [\mathbf{10}] / [\text{polynucleotide}] = 0.3$ ; CD titrations with **10**/ $\text{Cu}^{2+}$  of c) ct-DNA and d) poly A – poly U at  $r = [\mathbf{10}/\text{Cu}^{2+}] / [\text{polynucleotide}] = 0.3$ . Done at pH 7.0, buffer sodium cacodylate,  $I = 0.05$  M.



## Thermal denaturation of DNA/RNA

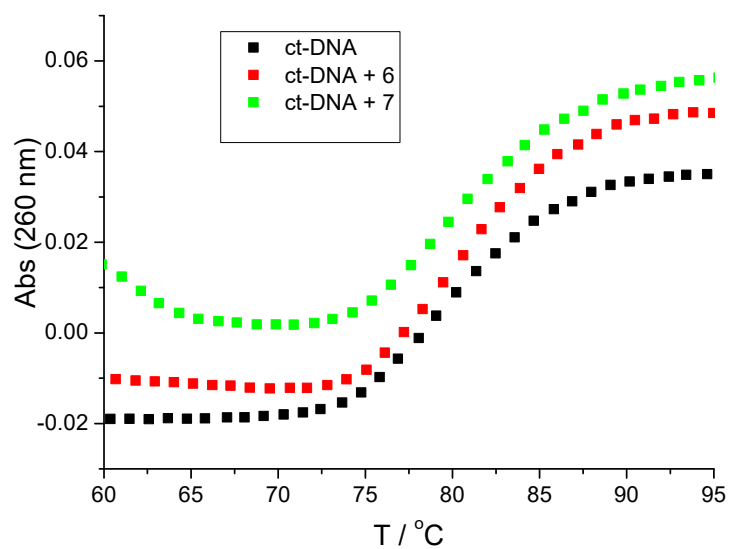

Figure S31. Thermal denaturation curves of ct-DNA ( $c(\text{ct-DNA}) = 2.5 \times 10^{-5} \text{ M}$ ,  $r[(\text{peptide})]/[\text{ct-DNA}] = 0.3$ ) at pH 7.0 (sodium cacodylate buffer,  $I = 0.05 \text{ M}$ ) upon addition of **6** or **7**. Error in  $\Delta T_m$  values:  $\pm 0.5 \text{ }^\circ\text{C}$ .



Complexes of **6** and **7** with  $\text{CuCl}_2$  were prepared by adding 5-fold excess of  $\text{CuCl}_2$  to the  $5 \times 10^{-6}\text{M}$  of peptide in the 1 mL of the sodium cacodylate buffer (pH 7). After 1 min. incubation period (to ensure complex formation), aliquot of DNA or RNA was added and immediately thermal denaturation experiment performed.

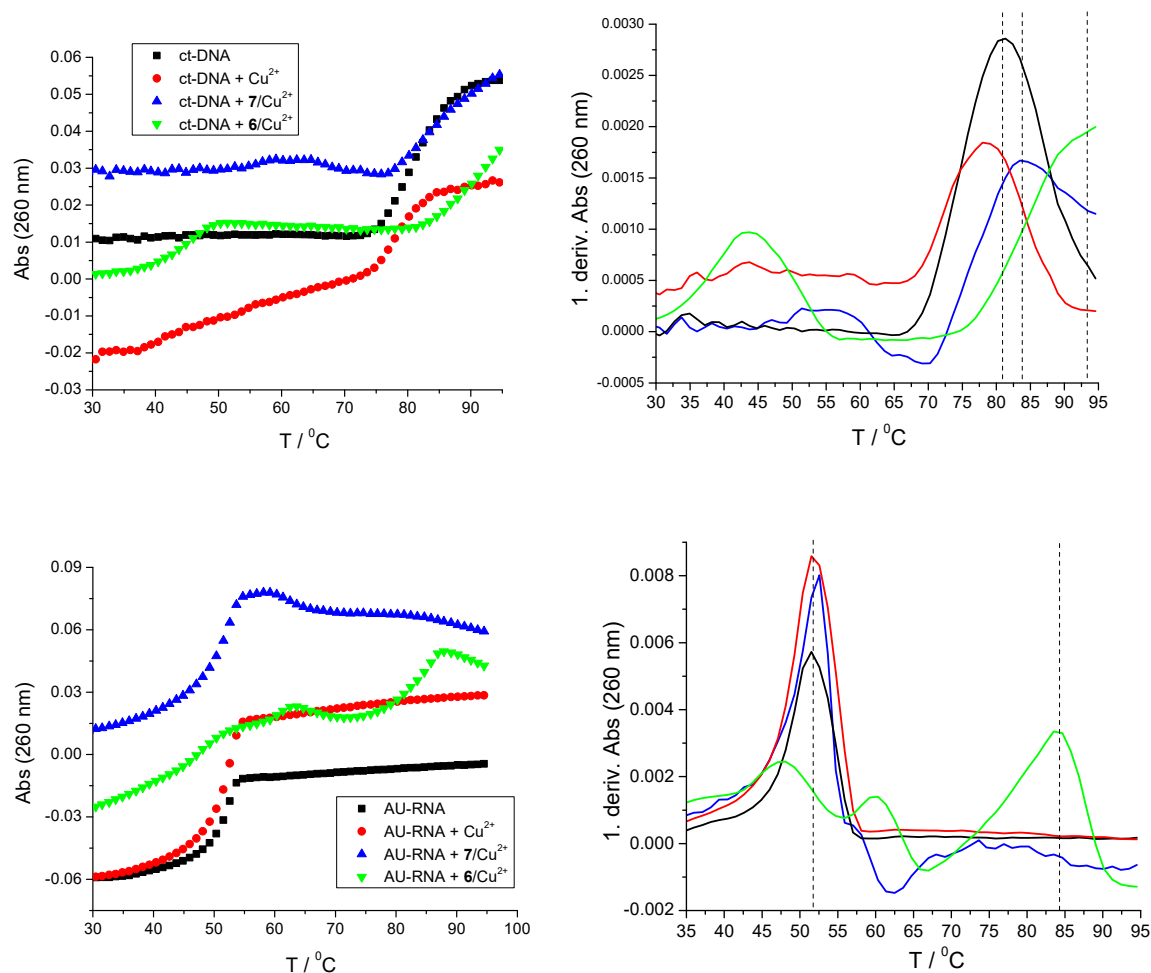

Figure S32. Thermal denaturation curves of: UP) ct-DNA ( $c(\text{ct-DNA}) = 2.5 \times 10^{-5}\text{M}$ , and DOWN) poly A poly U ( $c(\text{RNA}) = 2.5 \times 10^{-5}\text{M}$ , at pH 7.0 (sodium cacodylate buffer,  $I = 0.05\text{ M}$ ) upon addition of only  $\text{Cu}^{2+}$  solution, **6**/ $\text{Cu}^{2+}$  or **7**/ $\text{Cu}^{2+}$  complex at ratio  $r[\text{6/Cu}^{2+}]$  or  $7/\text{Cu}^{2+}]/[\text{polynucleotide}] = 0.25$ ). Error in  $\Delta T_m$  values:  $\pm 0.5\text{ }^\circ\text{C}$ .

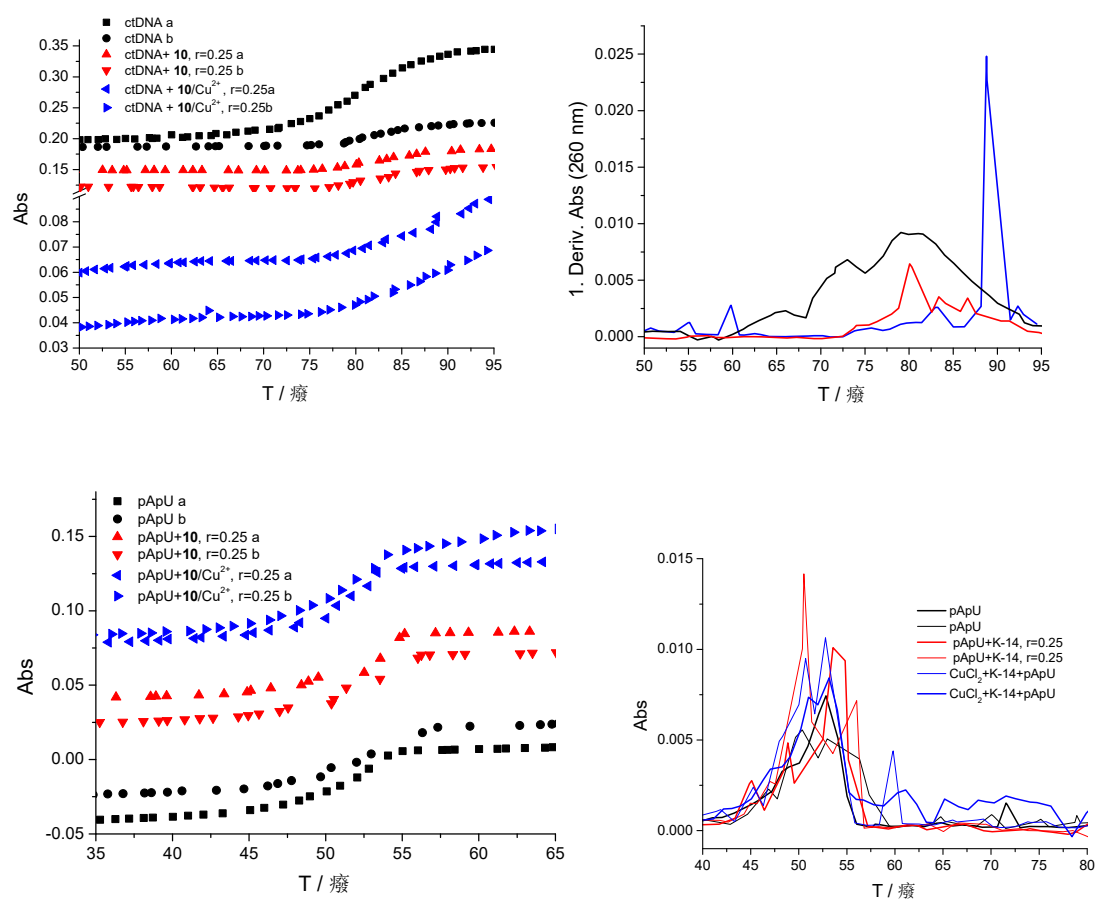

Figure S33. Thermal denaturation curves of: UP) ct-DNA ( $c(\text{ct-DNA}) = 2.5 \times 10^{-5}\text{M}$ , and DOWN) poly A poly U ( $c(\text{RNA}) = 2.5 \times 10^{-5}\text{M}$ , at pH 7.0 (sodium cacodylate buffer,  $I = 0.05\text{ M}$ ) upon addition of **10** or **10**/ $\text{Cu}^{2+}$  at ratio  $r[\text{10}]/[\text{polynucleotide}] = 0.25$ ). Error in  $\Delta T_m$  values:  $\pm 0.5\text{ }^{\circ}\text{C}$ .



## DAPI displacement:

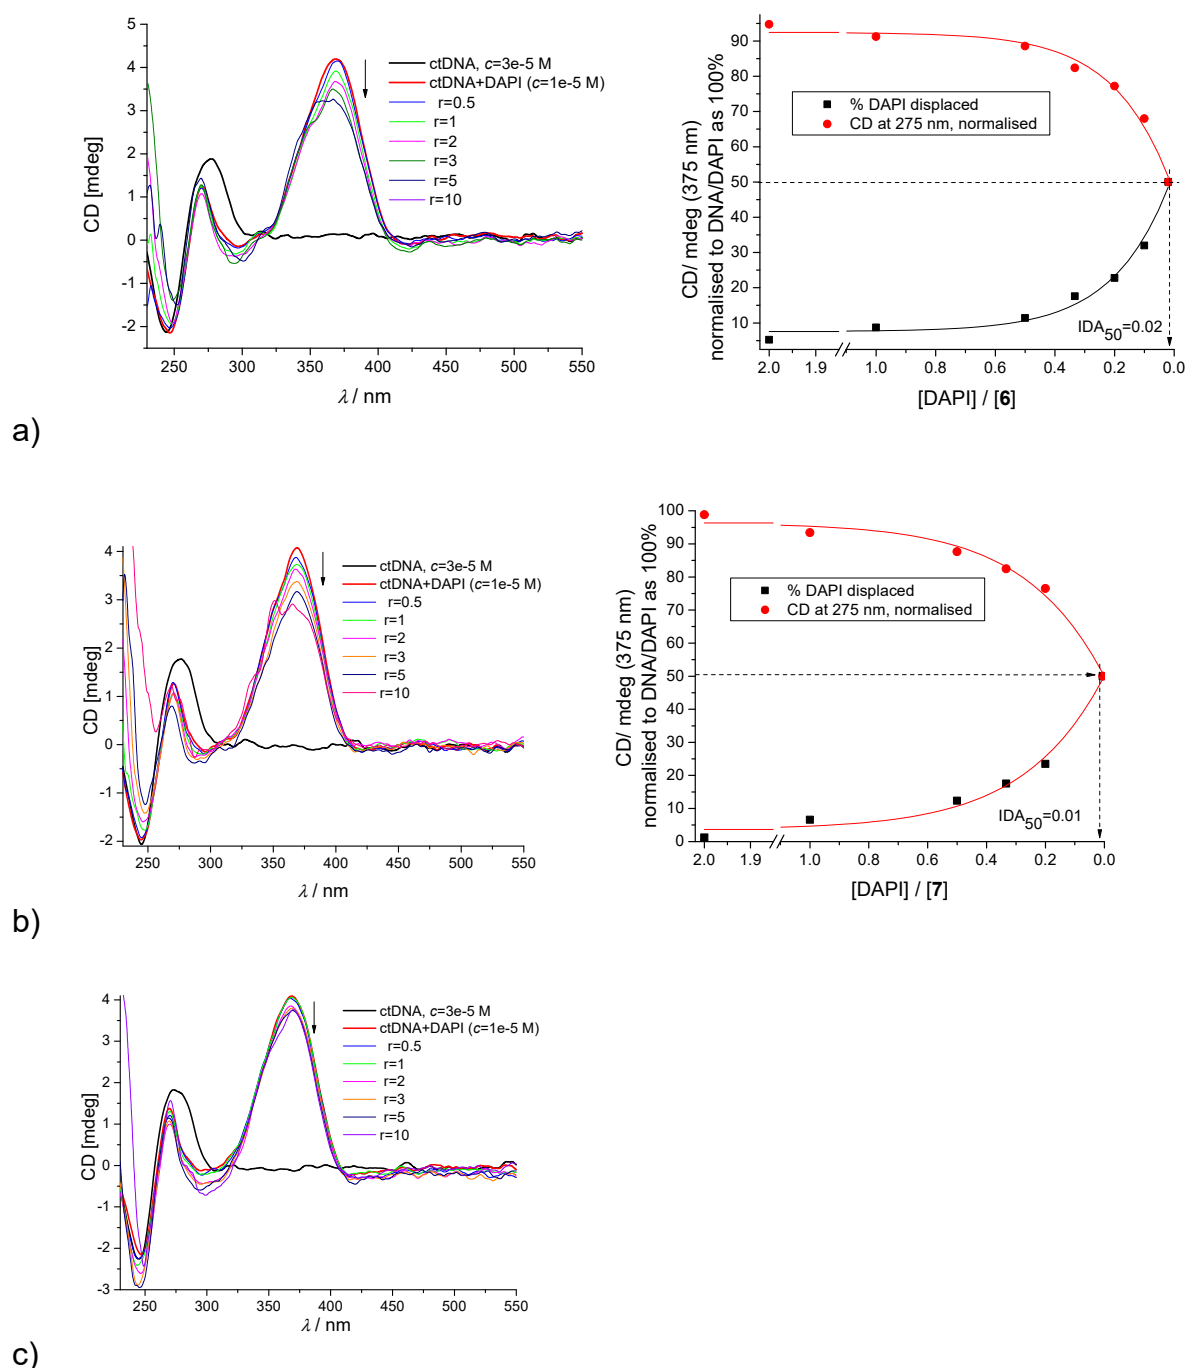

Figure S34. Changes in induced CD band of DAPI at 375 nm ( $c = 5 \times 10^{-6}$  M) from the complex with the ct-DNA ( $c = 2 \times 10^{-5}$  M): a) upon addition of a) **6**, b) **7** and c) **10**. Done at pH 7.0, buffer sodium cacodylate,  $I = 0.05$  M. The percentage of DAPI displaced by peptidoid was calculated, given IDA50% values presenting the ratio  $r = [\text{DAPI}] / [\text{peptidoid}]$  at which 50% of ICD<sub>375nm</sub> band is decreased in respect to the zero baseline of the free DNA.





#### 4. Biology:

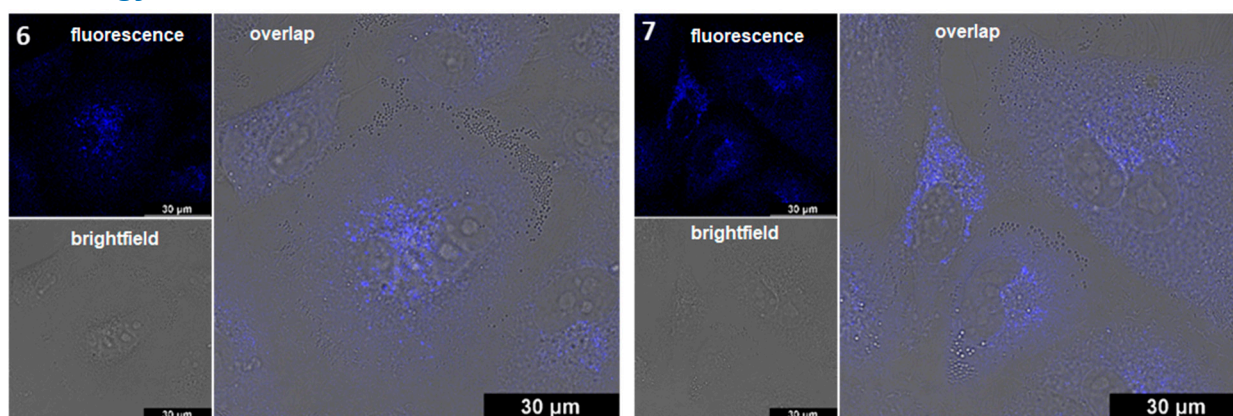

**Figure S35.** Uptake of compounds **6** and **7** in live A549 cells. Cells were treated with 10  $\mu\text{M}$  of each compound respectively for 90 min at 37°C and subsequently monitored by confocal microscopy ( $\lambda_{\text{exc}} = 405 \text{ nm}$ ,  $\lambda_{\text{em}} = 450\text{--}550 \text{ nm}$ ).

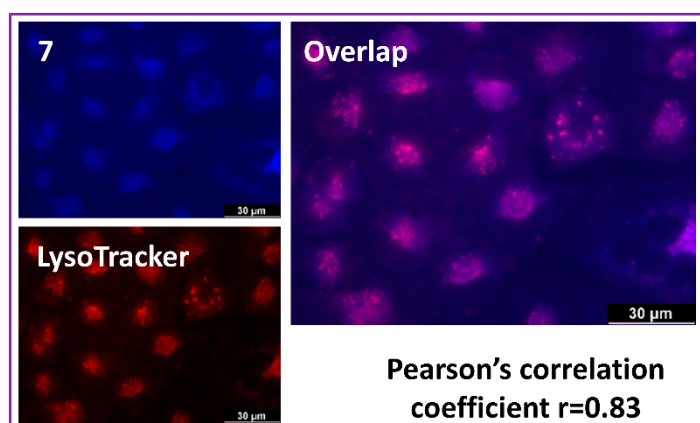

**Figure S36.** Intracellular localization of **7** (shown in blue) in A549 cells. Cells were treated with 10  $\mu\text{M}$  of compound for 90 min at 37°C and co-localization with lysosomes (LysoTracker), shown in red, was monitored by confocal microscopy. Cells were treated with 10  $\mu\text{M}$  of each compound respectively for 90 min at 37°C and subsequently monitored by confocal microscopy ( $\lambda_{\text{exc}} = 405 \text{ nm}$ ,  $\lambda_{\text{em}} = 450\text{--}550 \text{ nm}$ ). Analysis was done using ImageJ software and the appropriate JACoP plugin. Co-localization was assessed by the Pearson correlation coefficient.



## 5. References:

1. Stanley, N.J.; Sejer Pedersen, D.; Nielsen, B.; Kvist, T.; Mathiesen, J.M.; Bräuner-Osborne, H.; Taylor, D.K.; Abell, A.D. 1,2,3-Triazolyl amino acids as AMPA receptor ligands. *Bioorg. Med. Chem. Lett.* **2010**, *20*, 7512–7515.
2. Li, J.; Sha, Y. A Convenient Synthesis of Amino Acid Methyl Esters. *Molecules* **2008**, *13*, 1111–1119, <https://doi.org/10.3390/molecules13051111>.
3. Dourtoglou, V.; Gross, B.; Lambropoulou, V.; Zioudrou, C. O-benzotriazolyl-N,N,N',N'-tetramethyluronium hexafluoro-phosphate as coupling reagent for the synthesis of peptides of biological interest. *Synthesis* **1984**, *07*, 572–574.
4. Feldman, A.K.; Colasson, B.; Fokin, V.V. One-Pot Synthesis of 1,4-Disubstituted 1,2,3-Triazoles from In Situ Generated Azides. *Org. Lett.* **2004**, *6*, 3897–3899, <https://doi.org/10.1021/ol048859z>.
5. Hassan, S.; Mueller, T.J.J. ChemInform Abstract: Multicomponent Syntheses Based upon Copper-Catalyzed Alkyne-Azide Cycloaddition. *ChemInform* **2015**, *46*, <https://doi.org/10.1002/chin.201521260>.
6. Keller, O.; Keller, W.E.; van Look, G.; Wersin, G. Working with Hazardous Chemicals. *Org. Synth.* **1985**, *63*, 160.
7. Chaires, J.; Dattagupta, N.; Crothers, D.M. Studies on interaction of anthracycline antibiotics and deoxyribonucleic acid: equilibrium binding studies on the interaction of daunomycin with deoxyribonucleic acid. *Biochemistry* **1982**, *21*, 3933–3940, <https://doi.org/10.1021/bi00260a005>.
8. Tumir, L.-M.; Piantanida, I.; Cindrić, I.J.; Hrenar, T.; Meić, Z.; Žinić, M. New permanently charged phenanthridinium-nucleobase conjugates. Interactions with nucleotides and polynucleotides and recognition of ds-polyAH<sup>+</sup>. *J. Phys. Org. Chem.* **2003**, *16*, 891–899, <https://doi.org/10.1002/poc.680>.
9. Saenger, W. *Principles of Nucleic Acid Structure*; Springer: New York, NY, USA, 1983.
10. Cantor, C.R.; Schimmel, P.R. *Biophysical Chemistry*; WH Freeman and Co.: San Francisco, CA, USA, 1980; Volume 3, pp. 1109–1181.
